# Supplementary material for: Selected aryl thiosemicarbazones as a new class of multi-targeted monoamine oxidase inhibitors
Source: Royal Society of Chemistry journal article supplement (doi:10.1039/c8md00399h), 2018-01-01

SB1

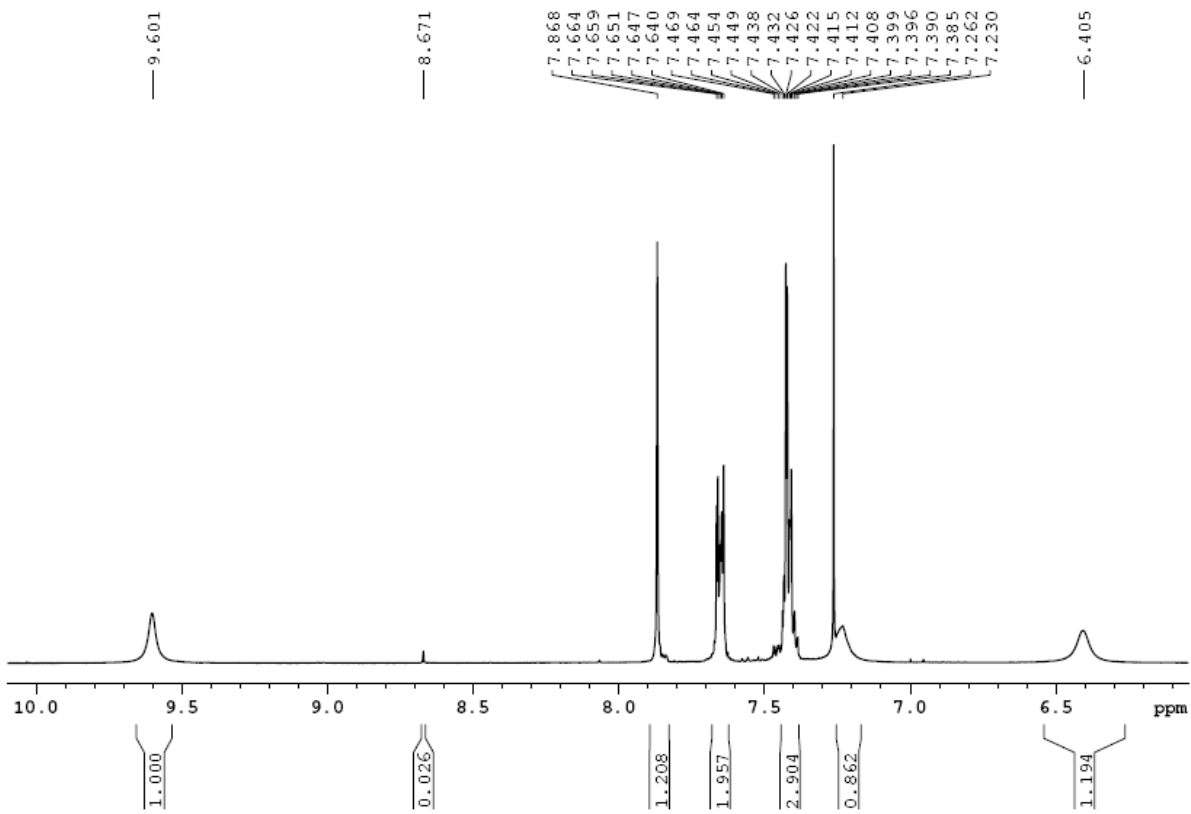

SB3

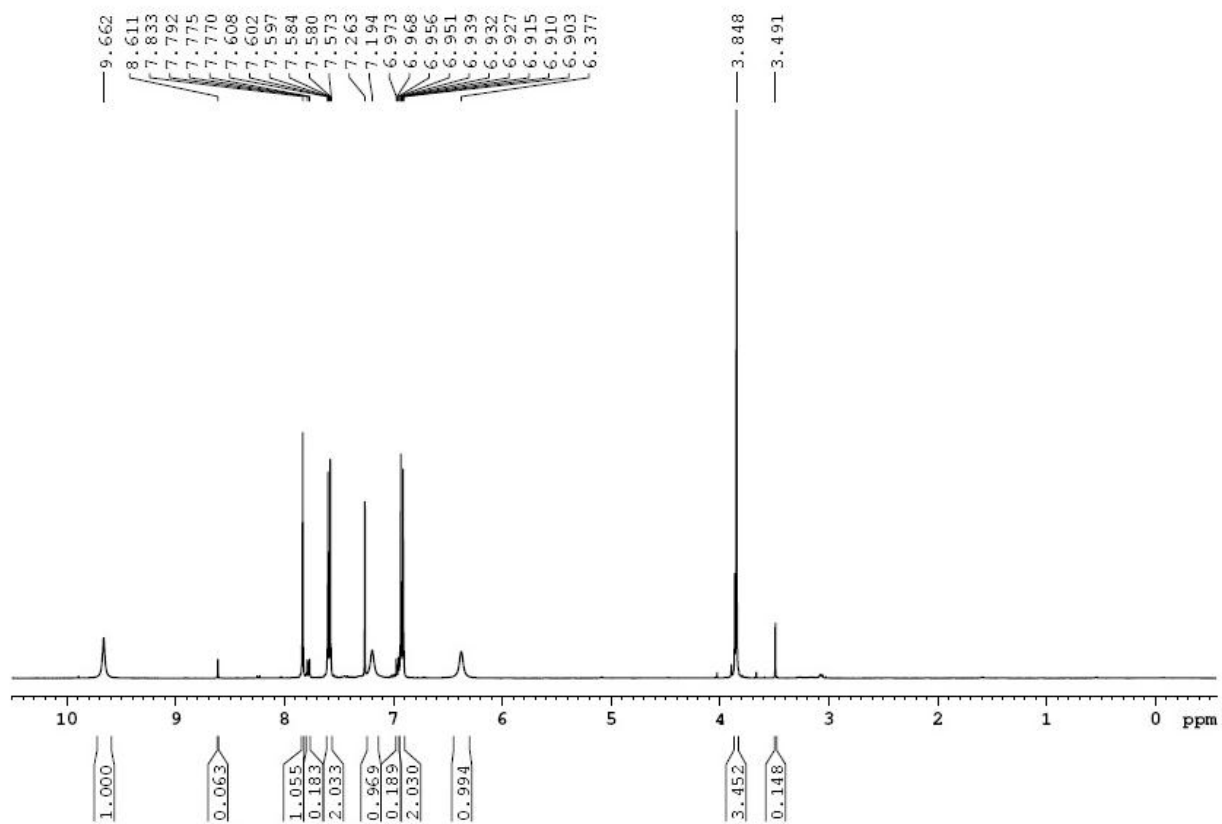

SB4

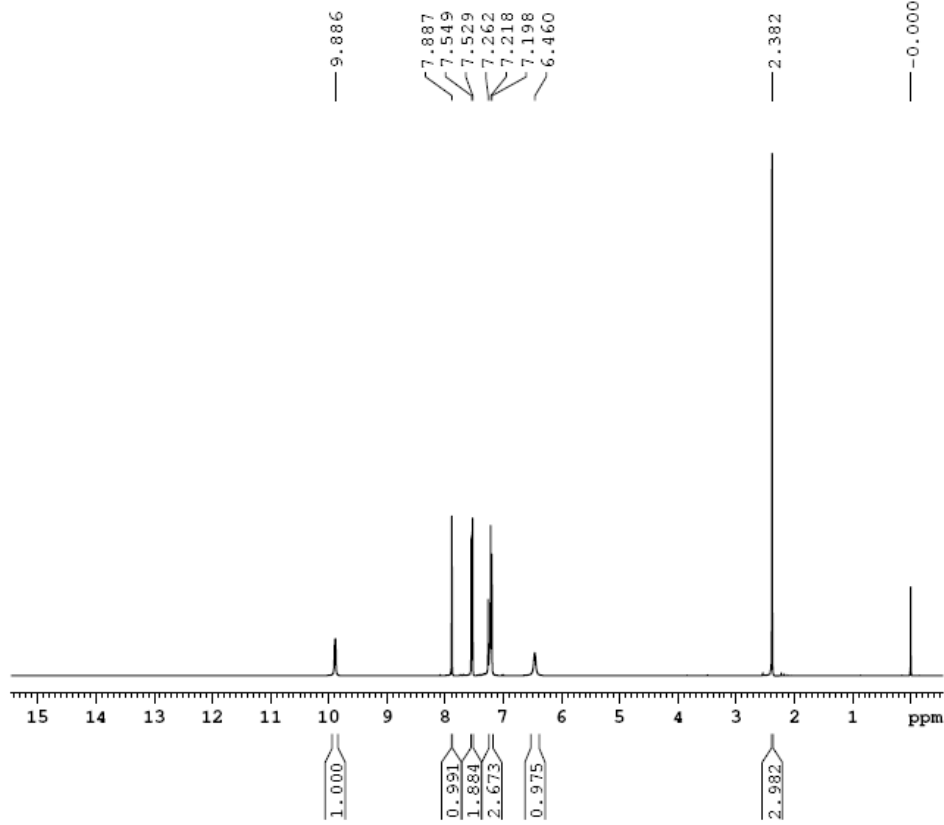

Current Data Parameters  
NAME 10\_krishnakumar  
EXPNO 2  
PROCNO 1

F2 - Acquisition Parameters  
Date\_ 20180110  
Time 9.37  
INSTRUM spect  
PROBHD 5 mm PABBO BB-  
PULPROG zg  
TD 32050  
SOLVENT CDCl3  
NS 32  
DS 0  
SWH 6410.256 Hz  
FIDRES 0.200008 Hz  
AQ 2.4999001 sec  
RG 203  
DW 78.000 usec  
DE 6.50 usec  
TE 298.0 K  
D1 2.00000000 sec  
TDO 1

==== CHANNEL f1 =====  
NUC1 1H  
P1 13.50 usec  
PL1 -3.00 dB  
PL1W 13.42244530 W  
SF01 400.2330017 MHz

F2 - Processing parameters  
SI 131072  
SF 400.2300195 MHz  
WDW EM  
SSB 0  
LB 0.30 Hz  
GB 0  
PC 1.00

SB5

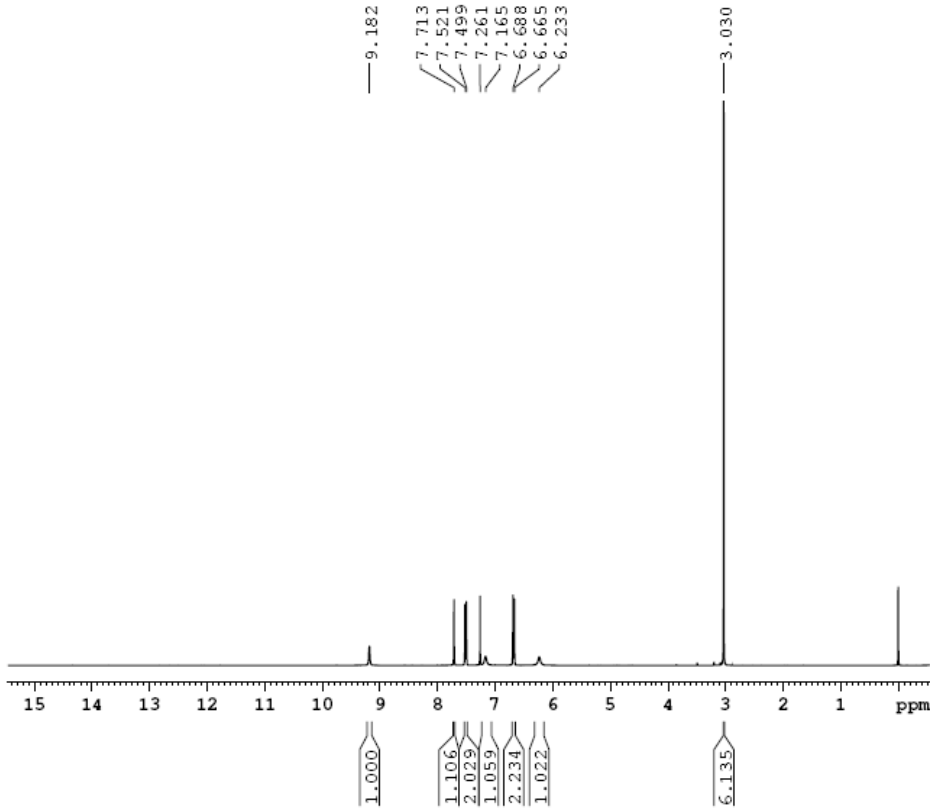

Current Data Parameters  
NAME 10\_krishnakumar  
EXPNO 5  
PROCNO 1

F2 - Acquisition Parameters  
Date\_ 20180110  
Time 16.41  
INSTRUM spect  
PROBHD 5 mm PABBO BB-  
PULPROG zg  
TD 32050  
SOLVENT CDC13  
NS 32  
DS 0  
SWH 6410.256 Hz  
FIDRES 0.200008 Hz  
AQ 2.4999001 sec  
RG 203  
DW 78.000 usec  
DE 6.50 usec  
TE 298.0 K  
D1 2.00000000 sec  
TDO 1

==== CHANNEL f1 =====  
NUC1 1H  
P1 13.50 usec  
PL1 -3.00 dB  
PL1W 13.42244530 W  
SFO1 400.2330017 MHz

F2 - Processing parameters  
SI 131072  
SF 400.2300198 MHz  
WDW EM  
SSB 0  
LB 0.30 Hz  
GB 0  
PC 1.00

SB6

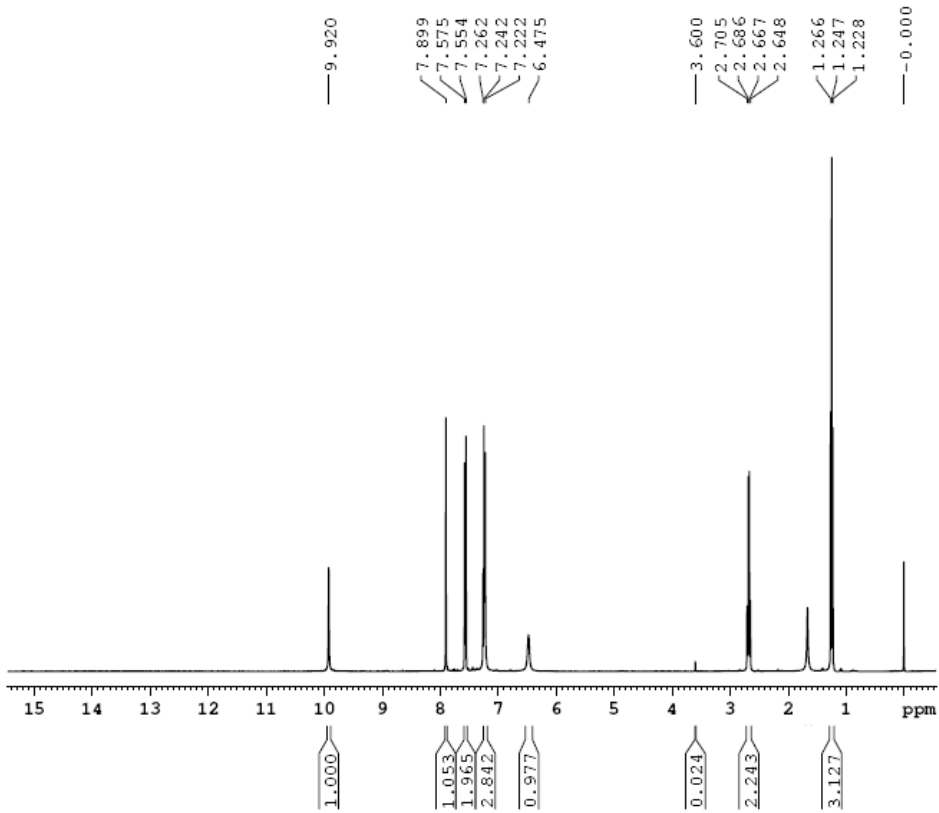

Current Data Parameters  
NAME 10\_krishnakumar  
EXPNO 3  
PROCNO 1

F2 - Acquisition Parameters  
Date\_ 20180110  
Time 9.44  
INSTRUM spect  
PROBHD 5 mm PABBO BB-  
PULPROG zg  
TD 32050  
SOLVENT CDC13  
NS 32  
DS 0  
SWH 6410.256 Hz  
FIDRES 0.200008 Hz  
AQ 2.4999001 sec  
RG 203  
DW 78.000 usec  
DE 6.50 usec  
TE 298.0 K  
D1 2.00000000 sec  
TD0 1

==== CHANNEL f1 =====  
NUC1 1H  
P1 13.50 usec  
PL1 -3.00 dB  
PL1W 13.42244530 W  
SFO1 400.2330017 MHz

F2 - Processing parameters  
SI 131072  
SF 400.2300201 MHz  
WDW EM  
SSB 0  
LB 0.30 Hz  
GB 0  
PC 1.00

SB7

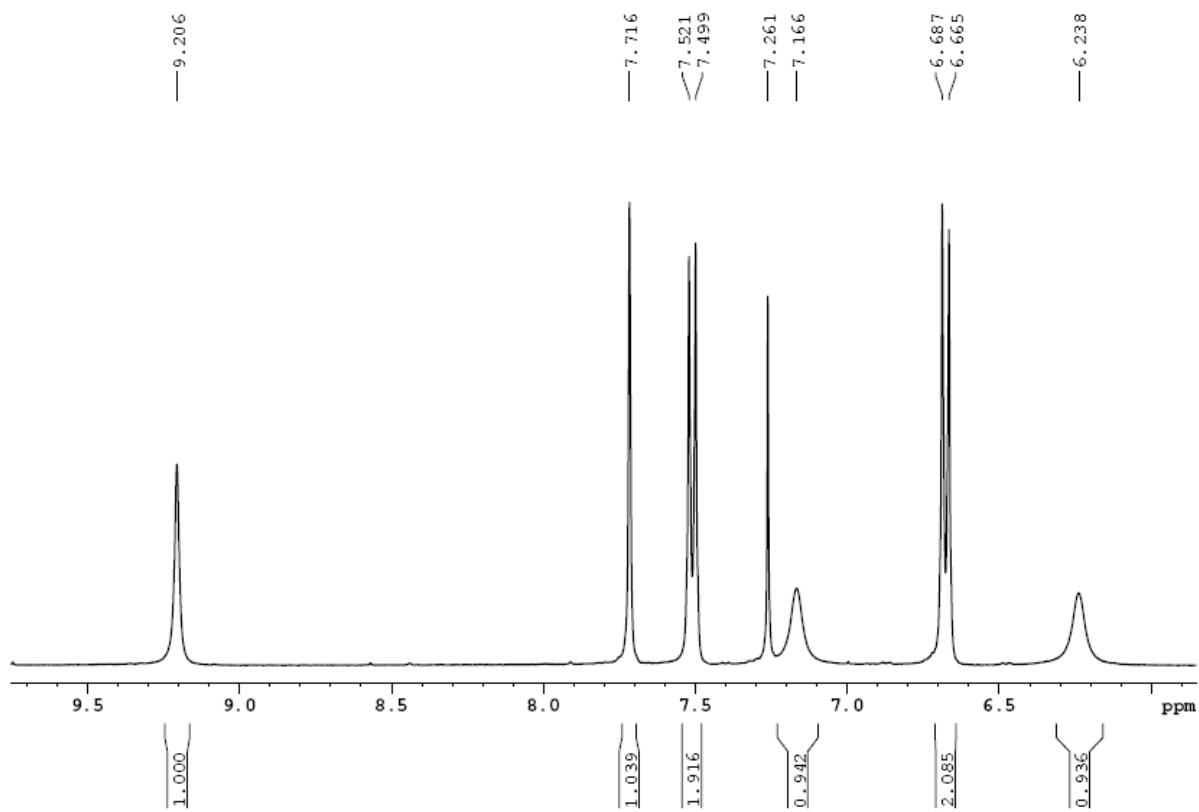

SB8

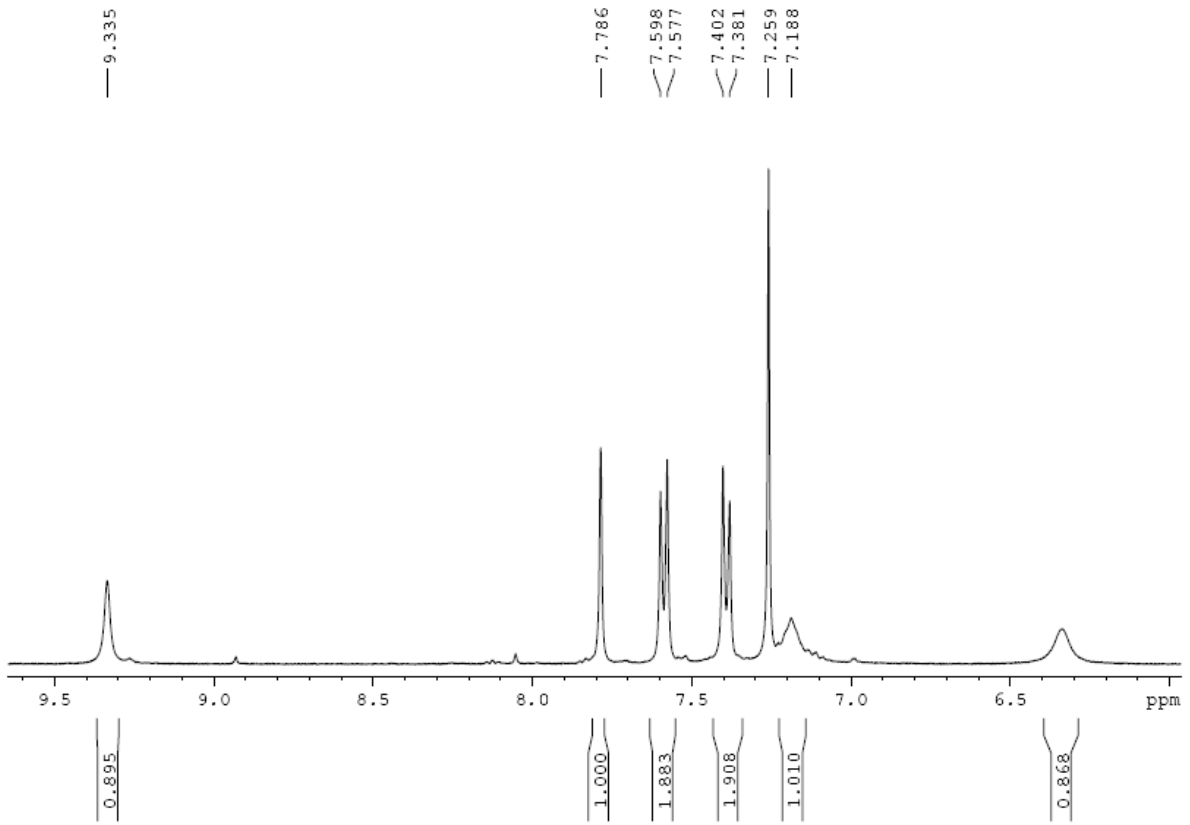

SB9

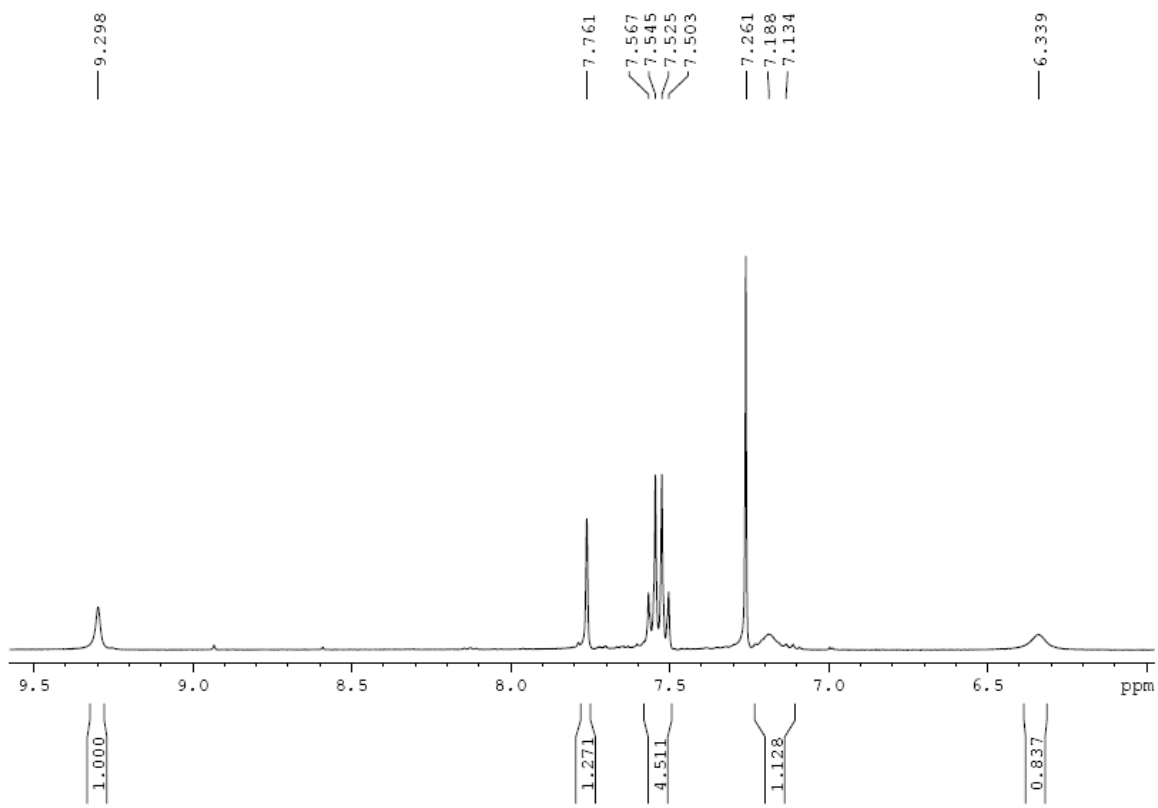



SB10

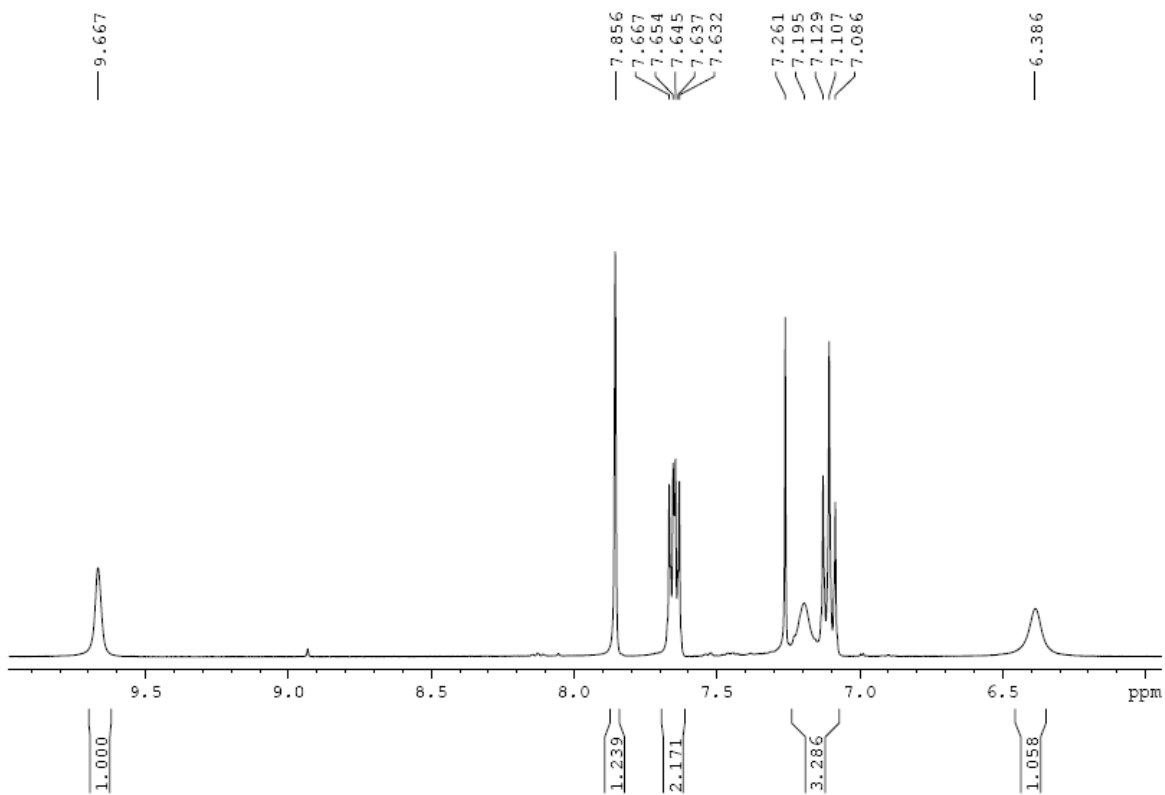

SB 11

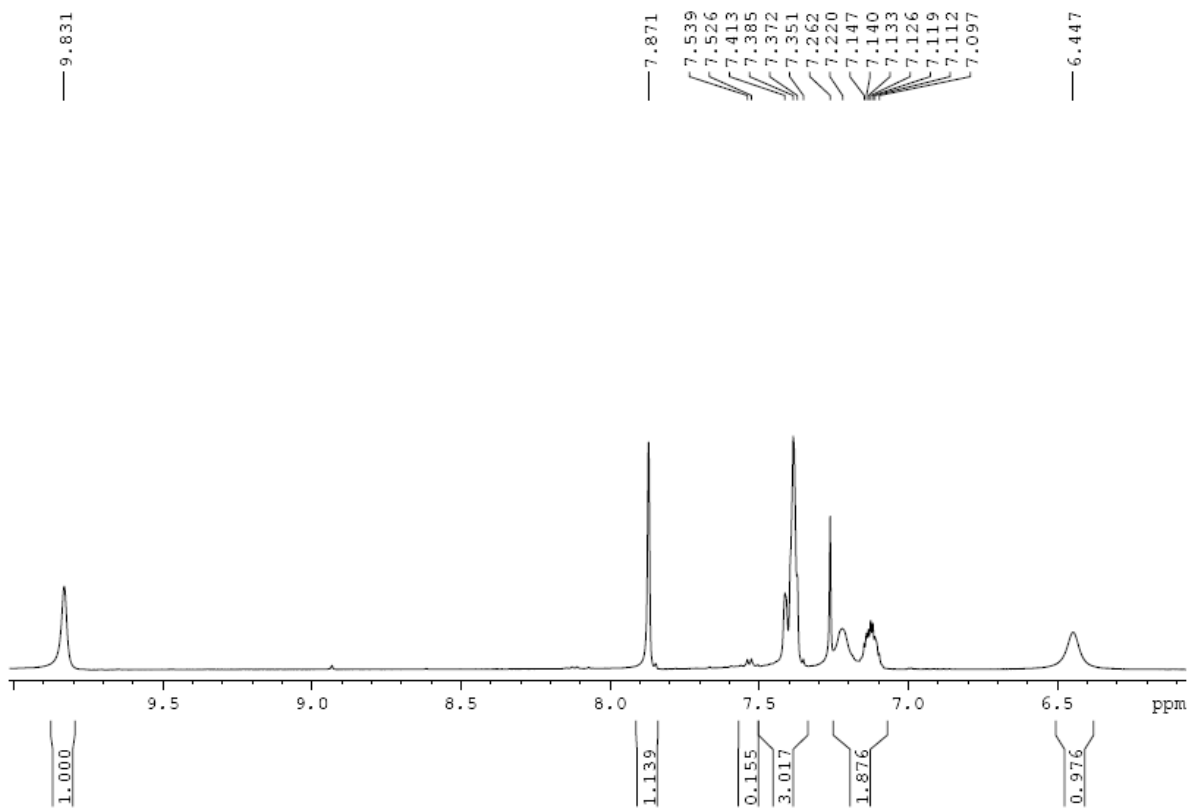

SB12

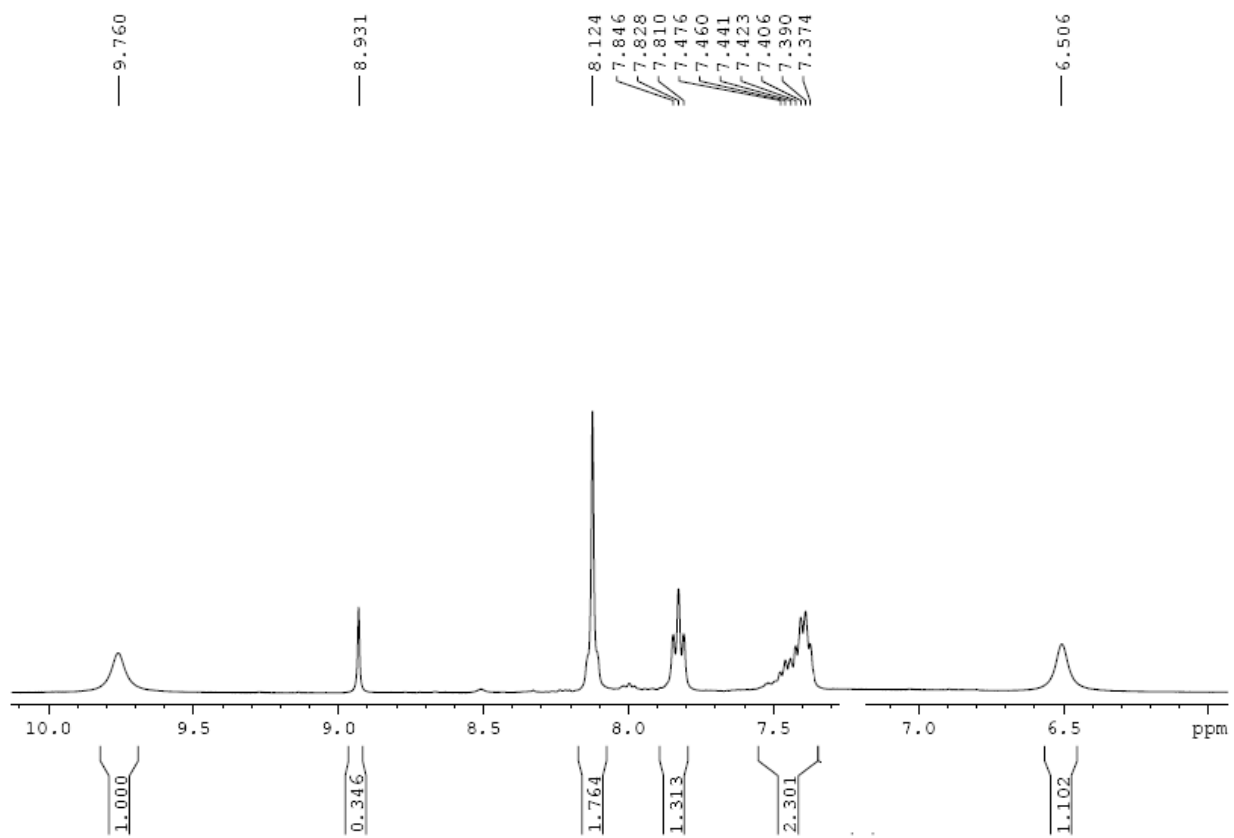

SB13

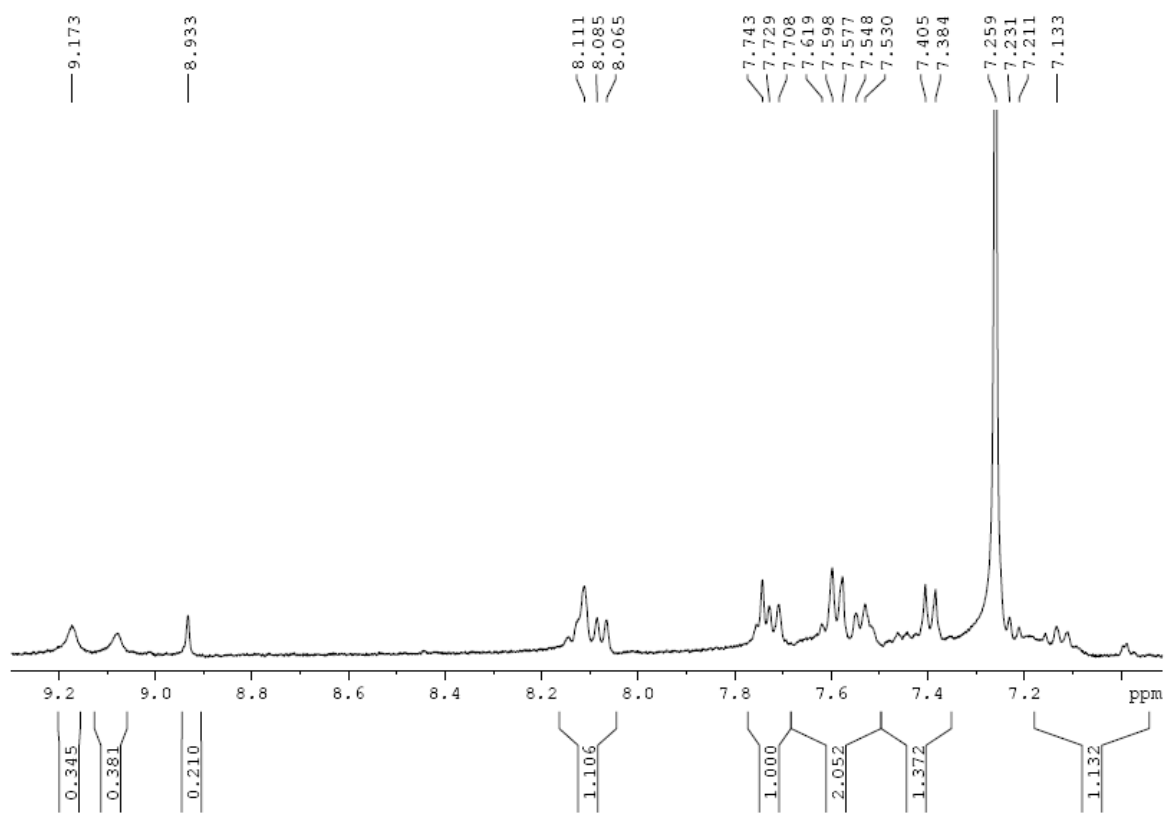

SB10

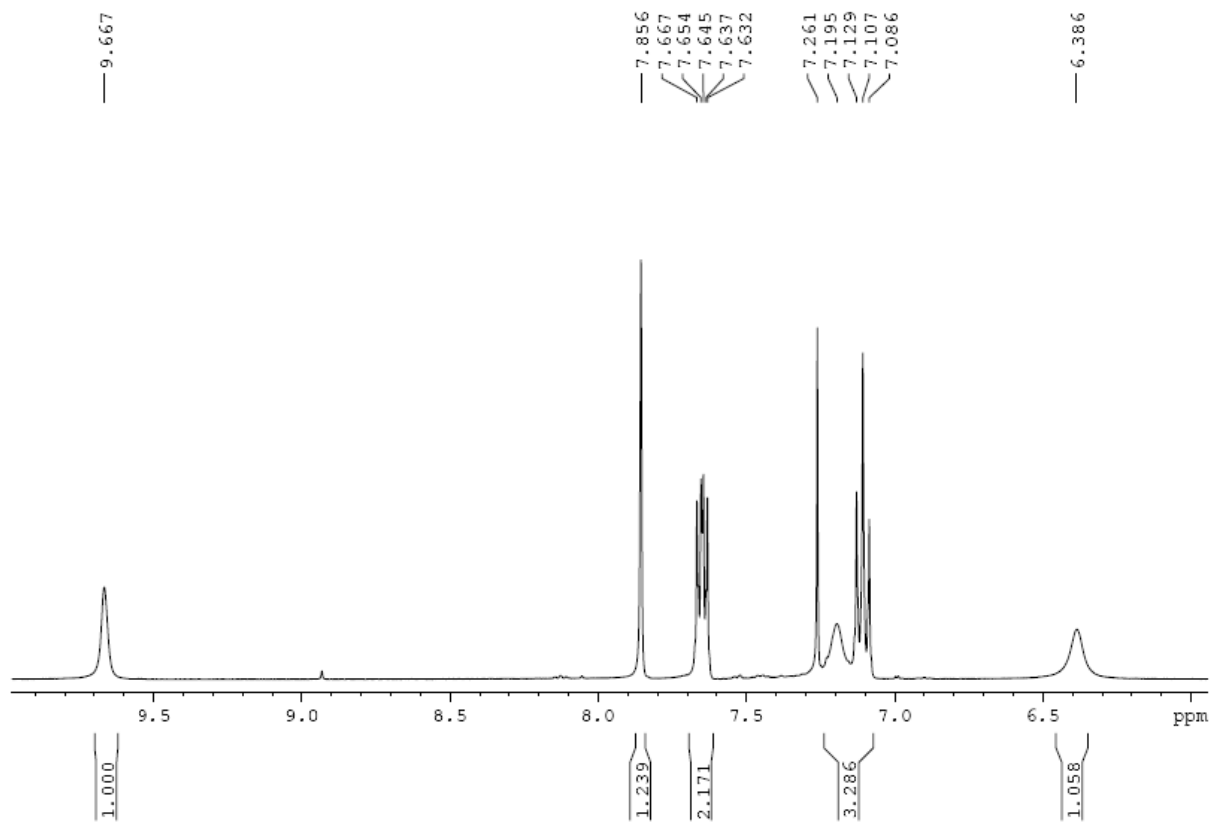

Supplement: c8md00399h2.pdf [file c8md00399h2.pdf]
