# Supplementary material for: Selected aryl thiosemicarbazones as a new class of multi-targeted monoamine oxidase inhibitors
Source: Royal Society of Chemistry journal article supplement (doi:10.1039/c8md00399h), 2018-01-01

Mass spectra of the Sb series

**Sb1**

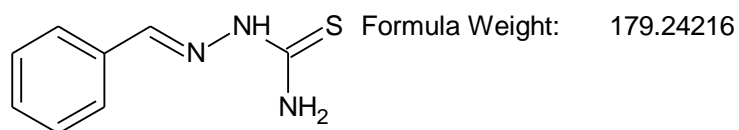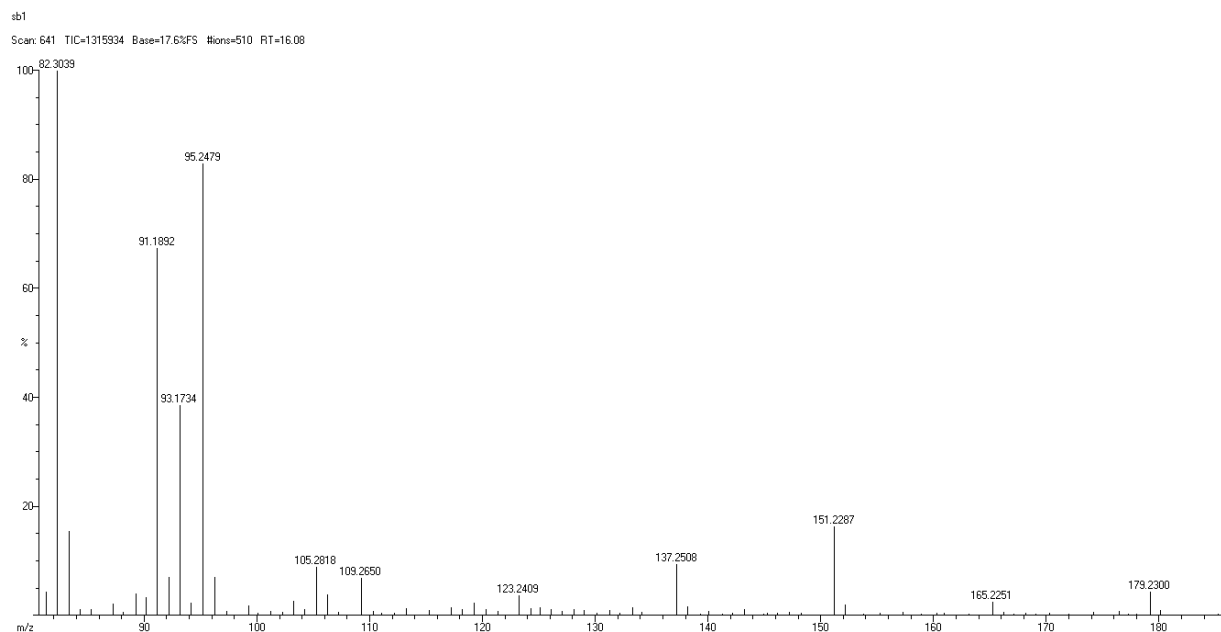

Sb2

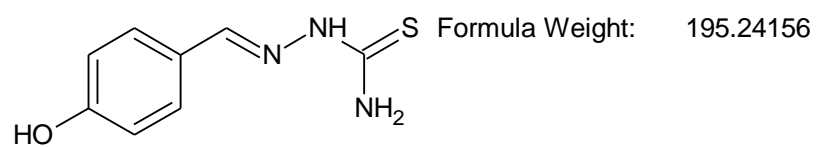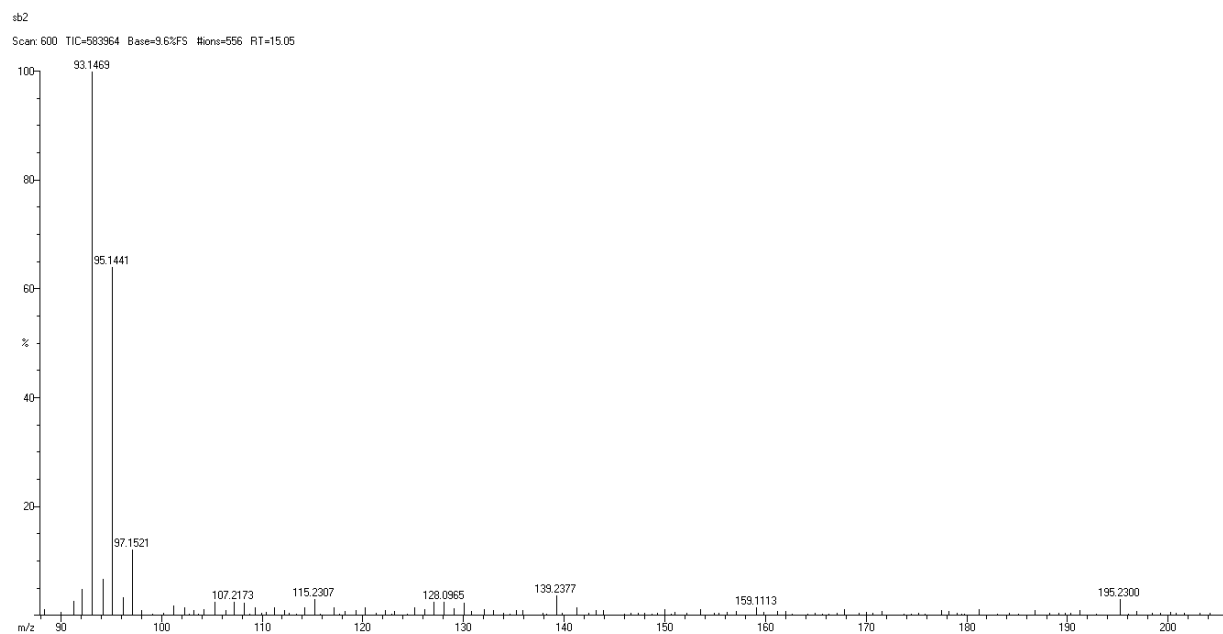

Sb3

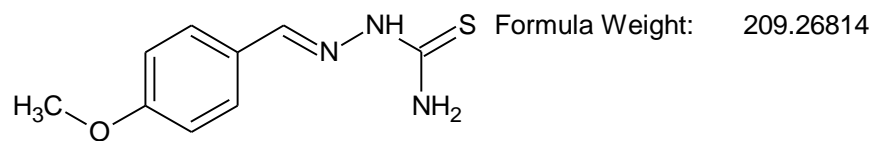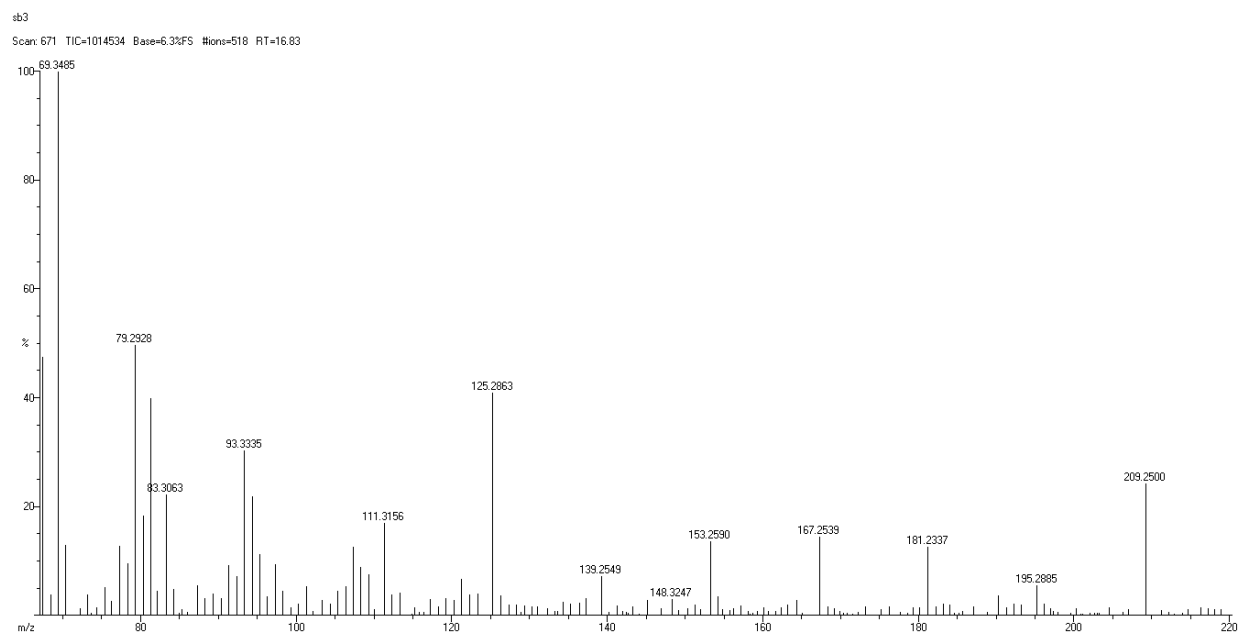

Sb4

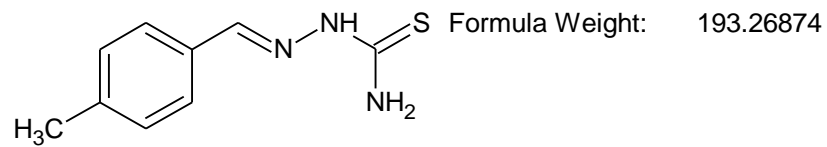

Sb4

Scan: 707 TIC=1334085 Base=6.3%FS #Ions=501 RT=17.73

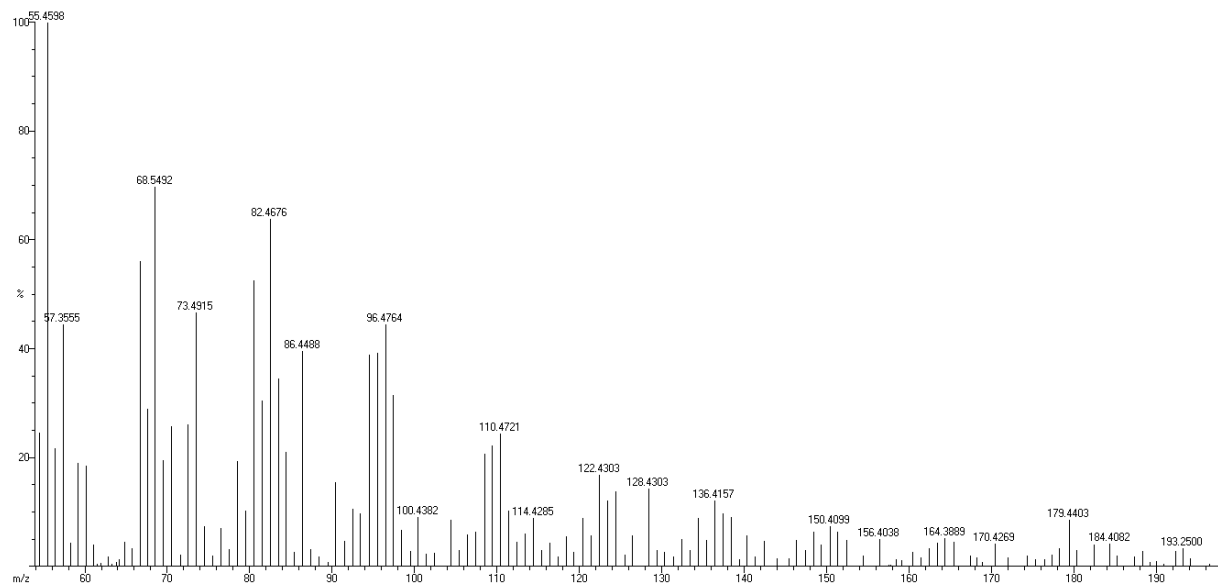

Sb5

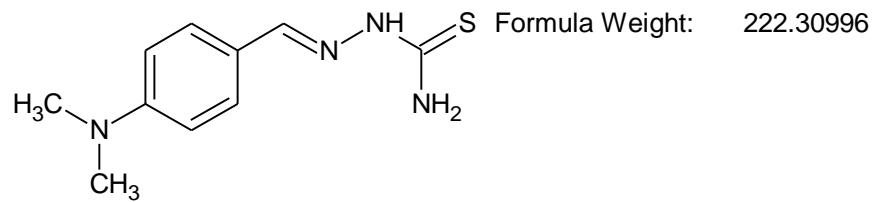

sb5

Scan: 715 TIC=1179799 Base=12.9%FS #Ions=503 RT=17.93

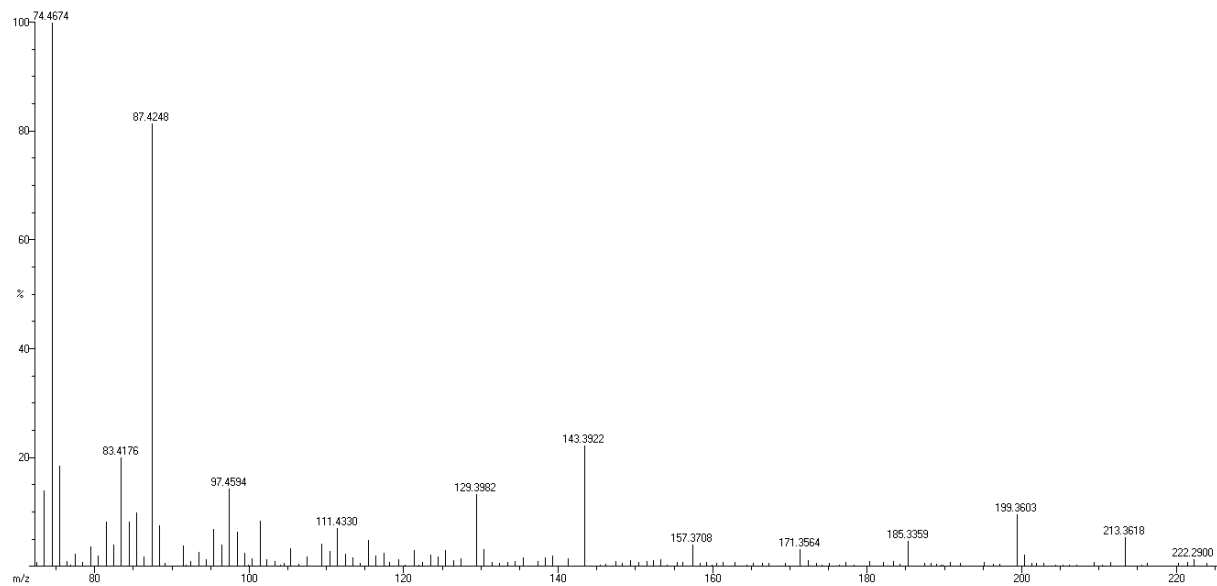

Sb6

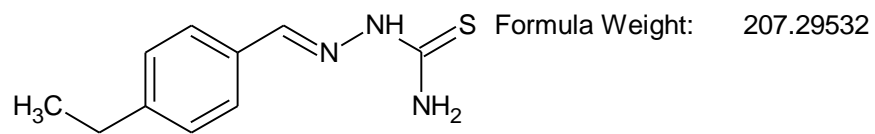

sb6

Scan: 738 TIC=1818508 Base=11.3%FS Ions=492 RT=18.52

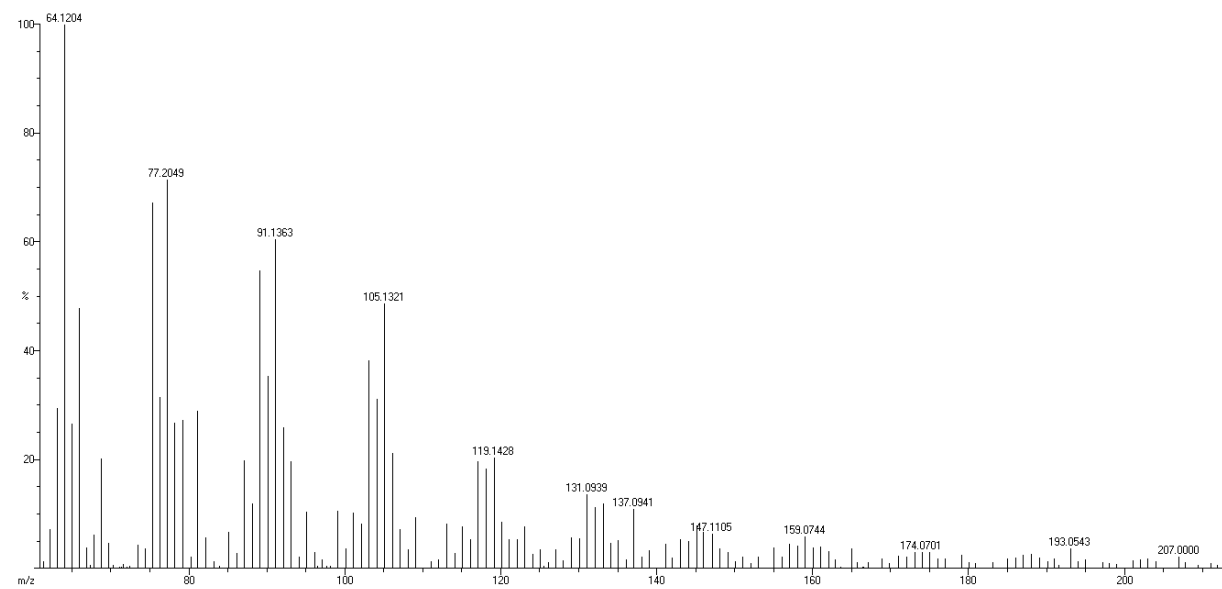

Sb7

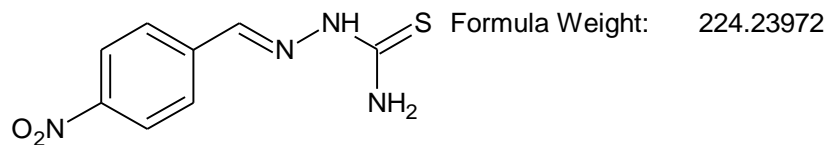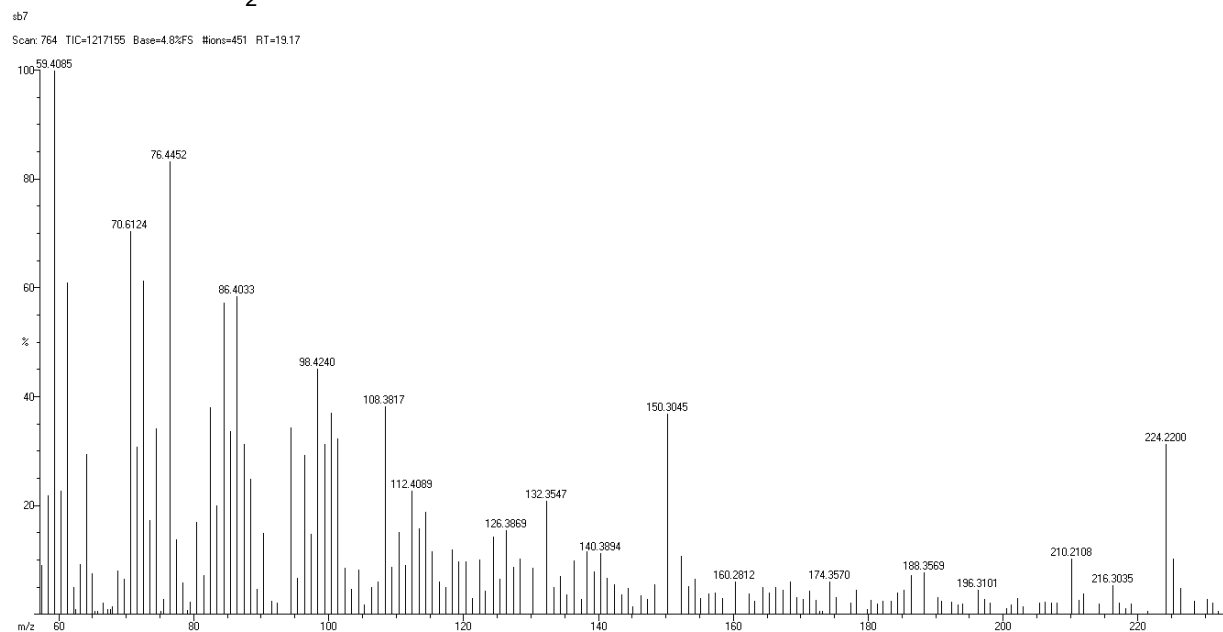

Sb8

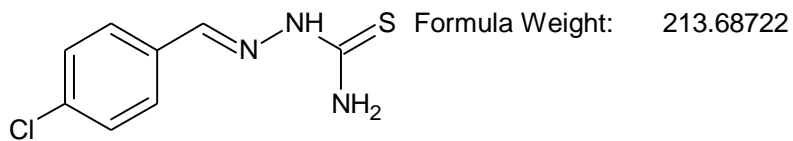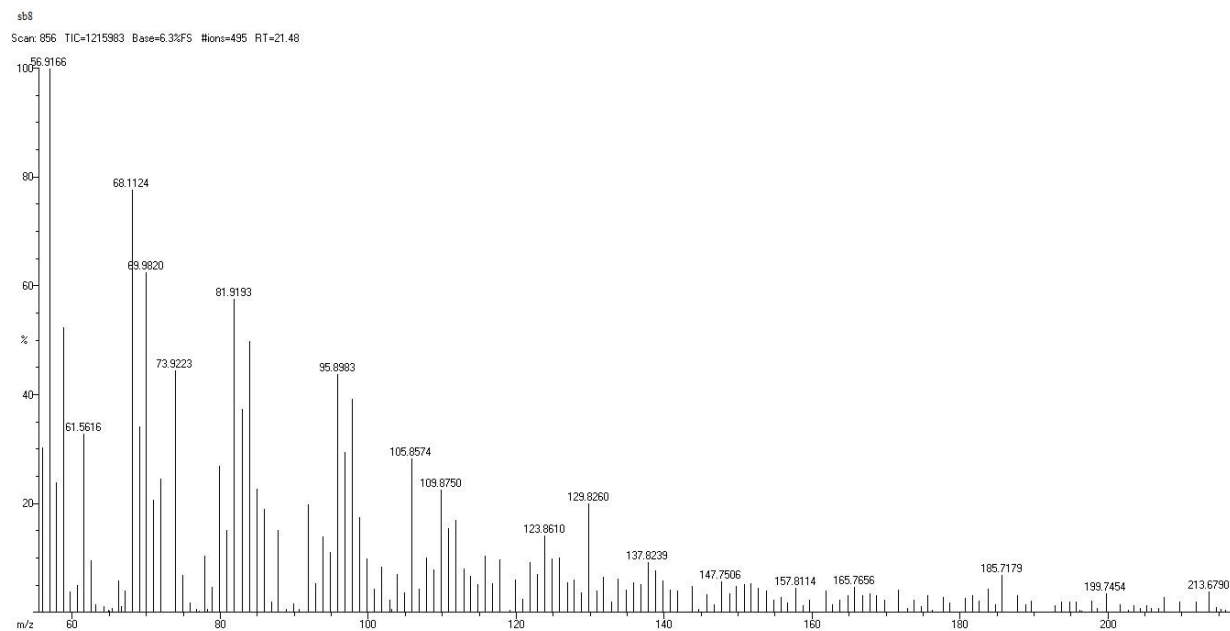

Sb9

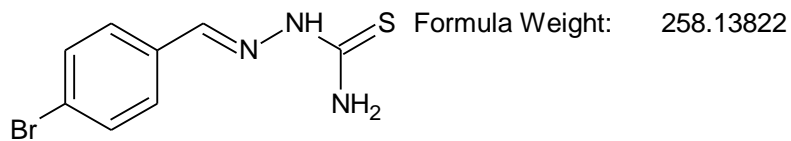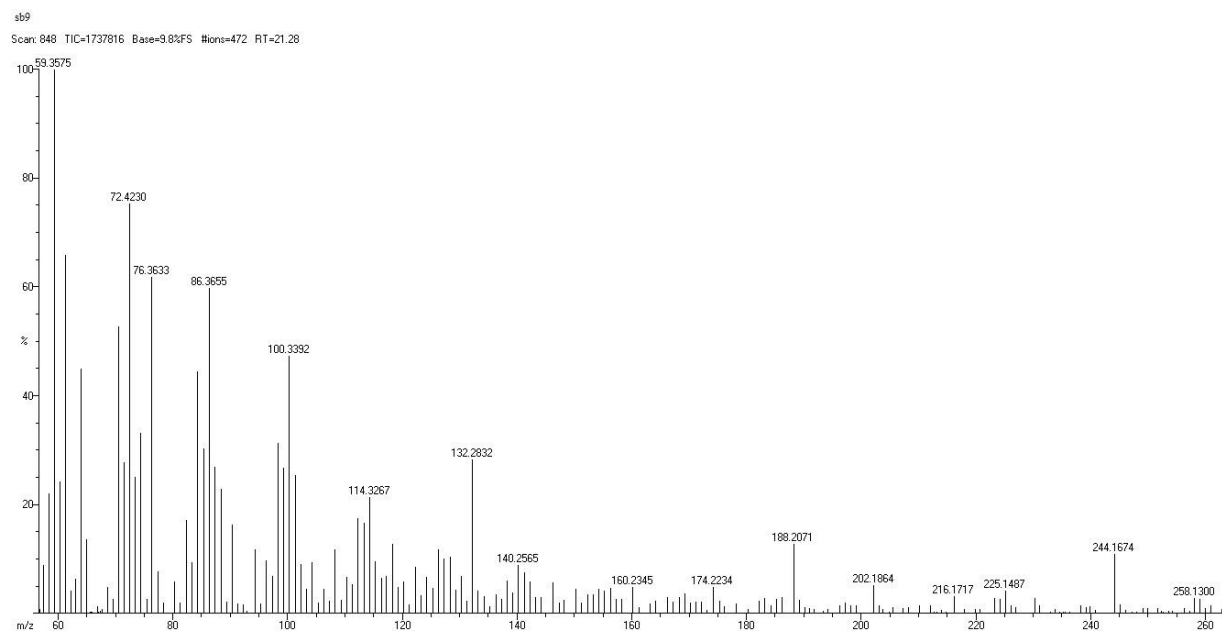

**Sb10**

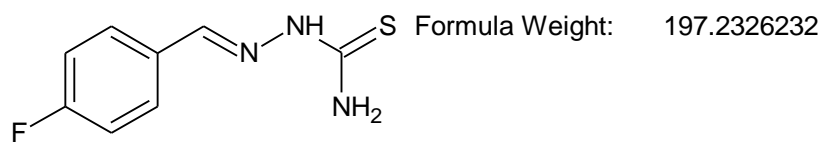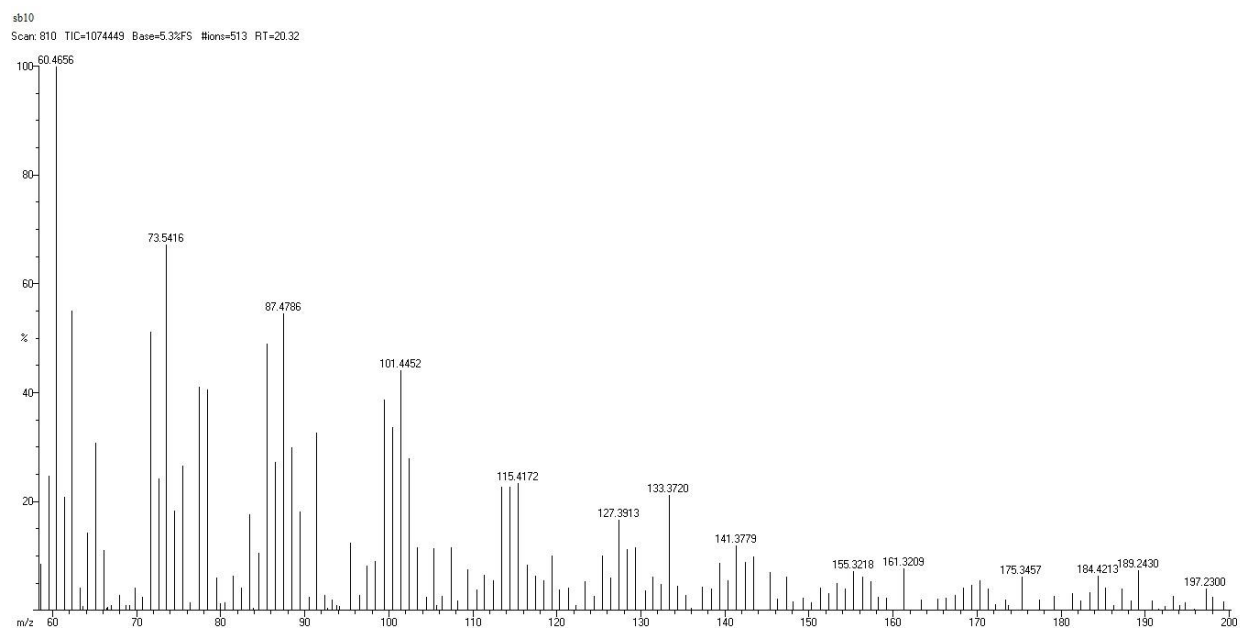

# Sb11

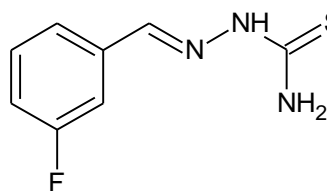

Formula Weight: 197.2326232

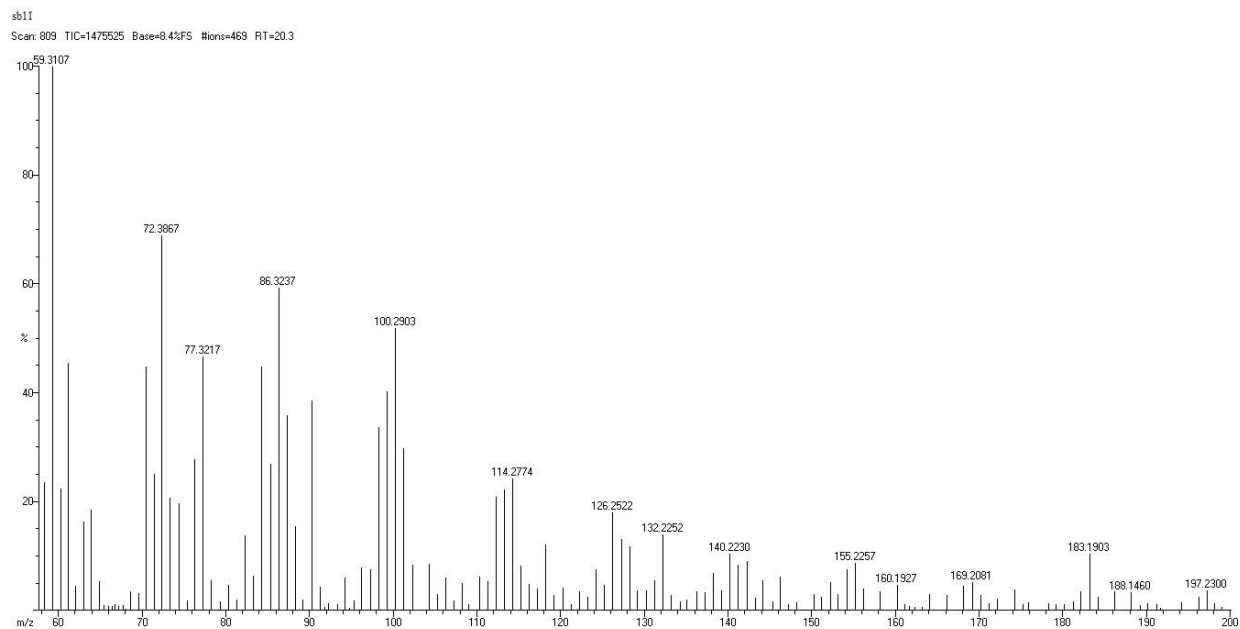

# Sb12

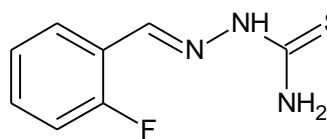

Formula Weight: 197.2326232

sb12

Scan: 814 TIC=762619 Base=3.9%FS #Ions=507 RT=20.42

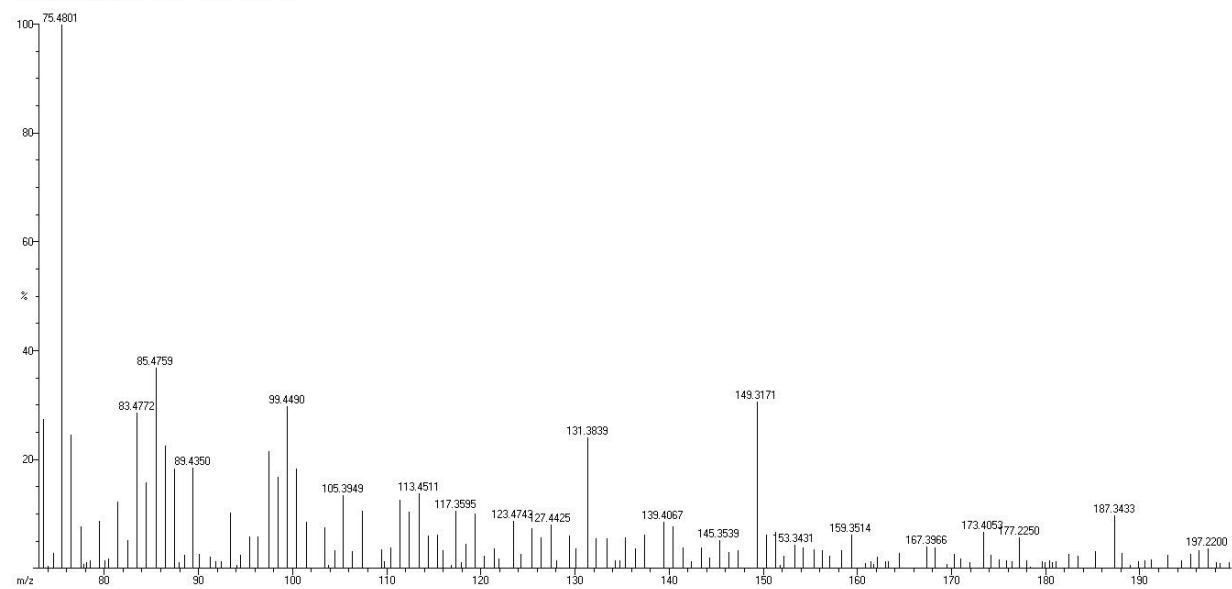

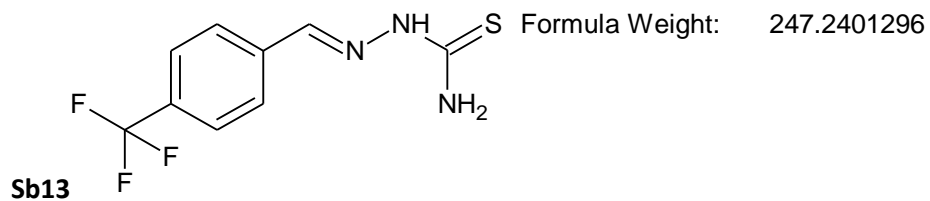

sb13

Scan: 813 TIC=712618 Base=3%FS #Ions=506 RT=20.4

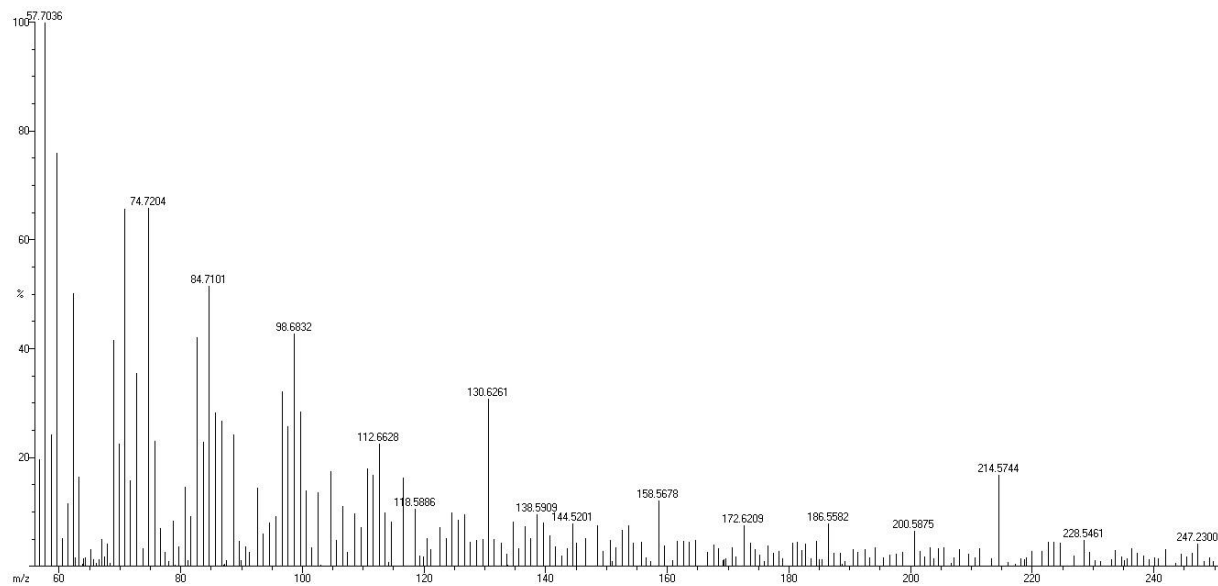

Supplement: c8md00399h3.pdf [file c8md00399h3.pdf]
