# Supplementary figures and images for: Selected aryl thiosemicarbazones as a new class of multi-targeted monoamine oxidase inhibitors
Source: Royal Society of Chemistry journal article supplement (doi:10.1039/c8md00399h), 2018-01-01

SB1

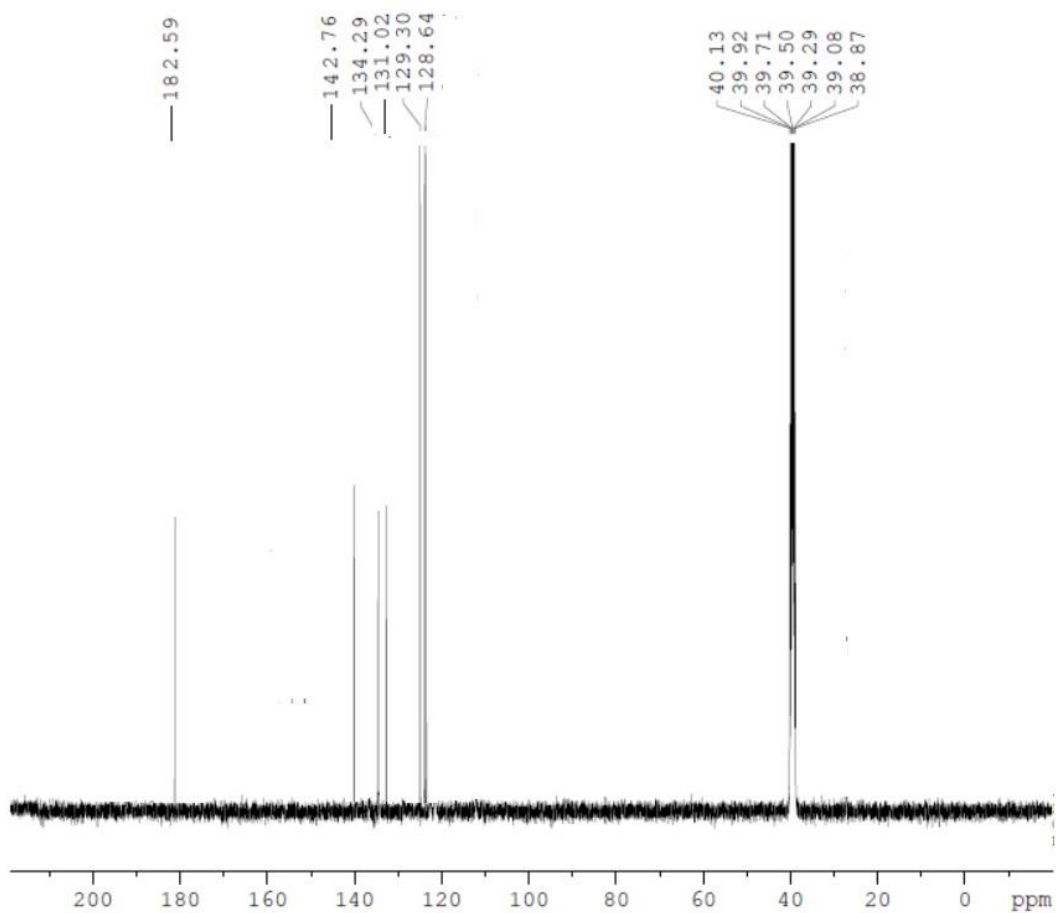

SB3

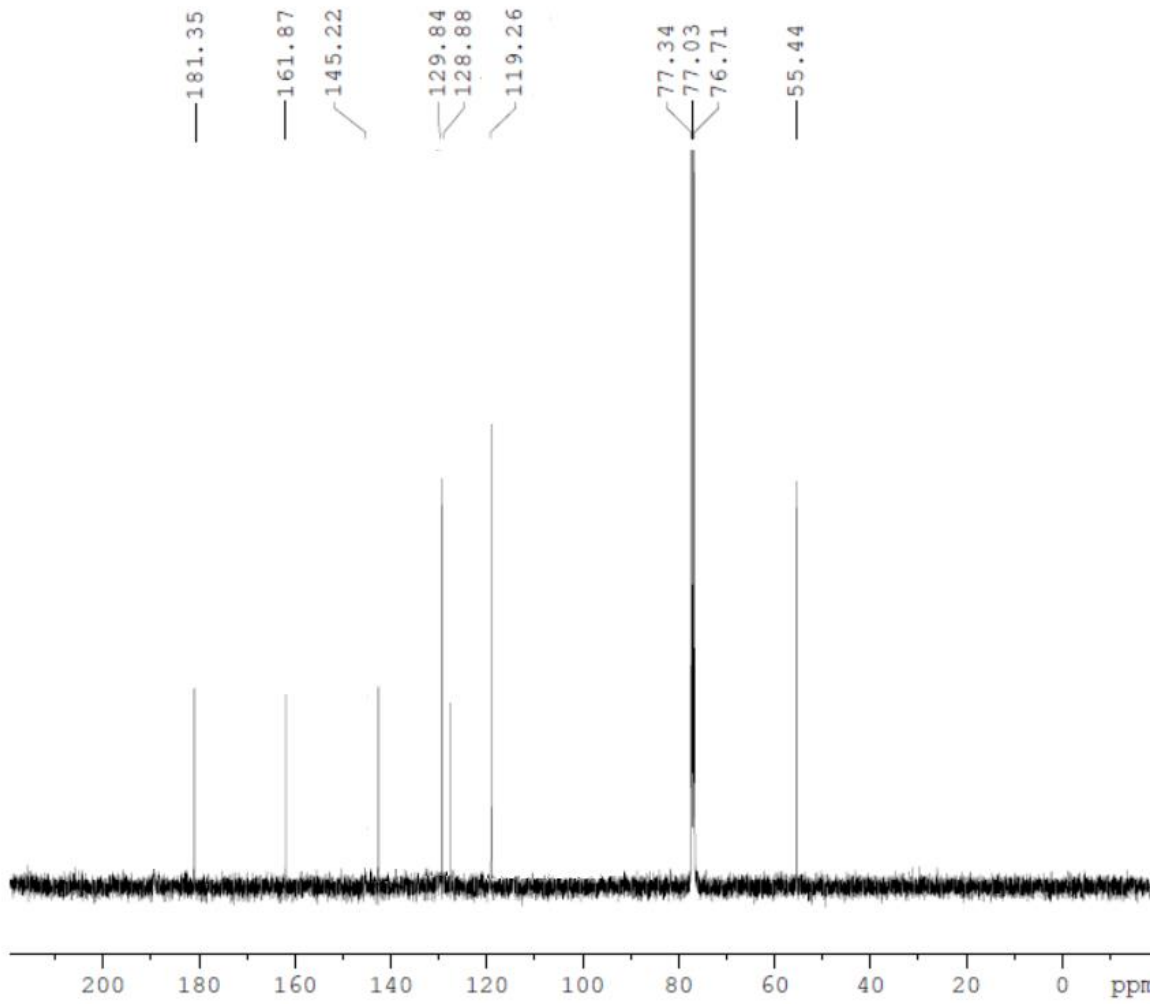

SB4

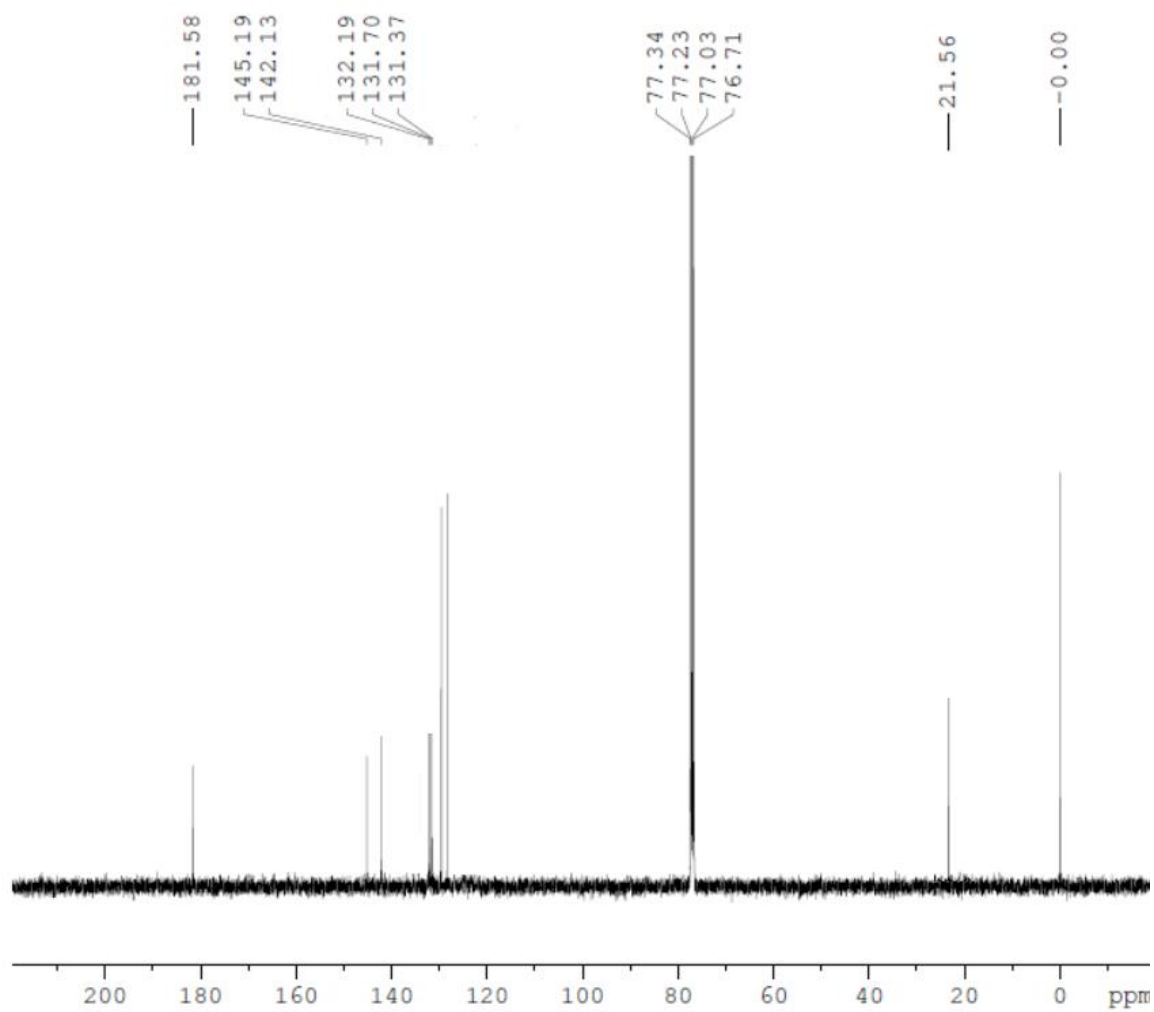

SB5

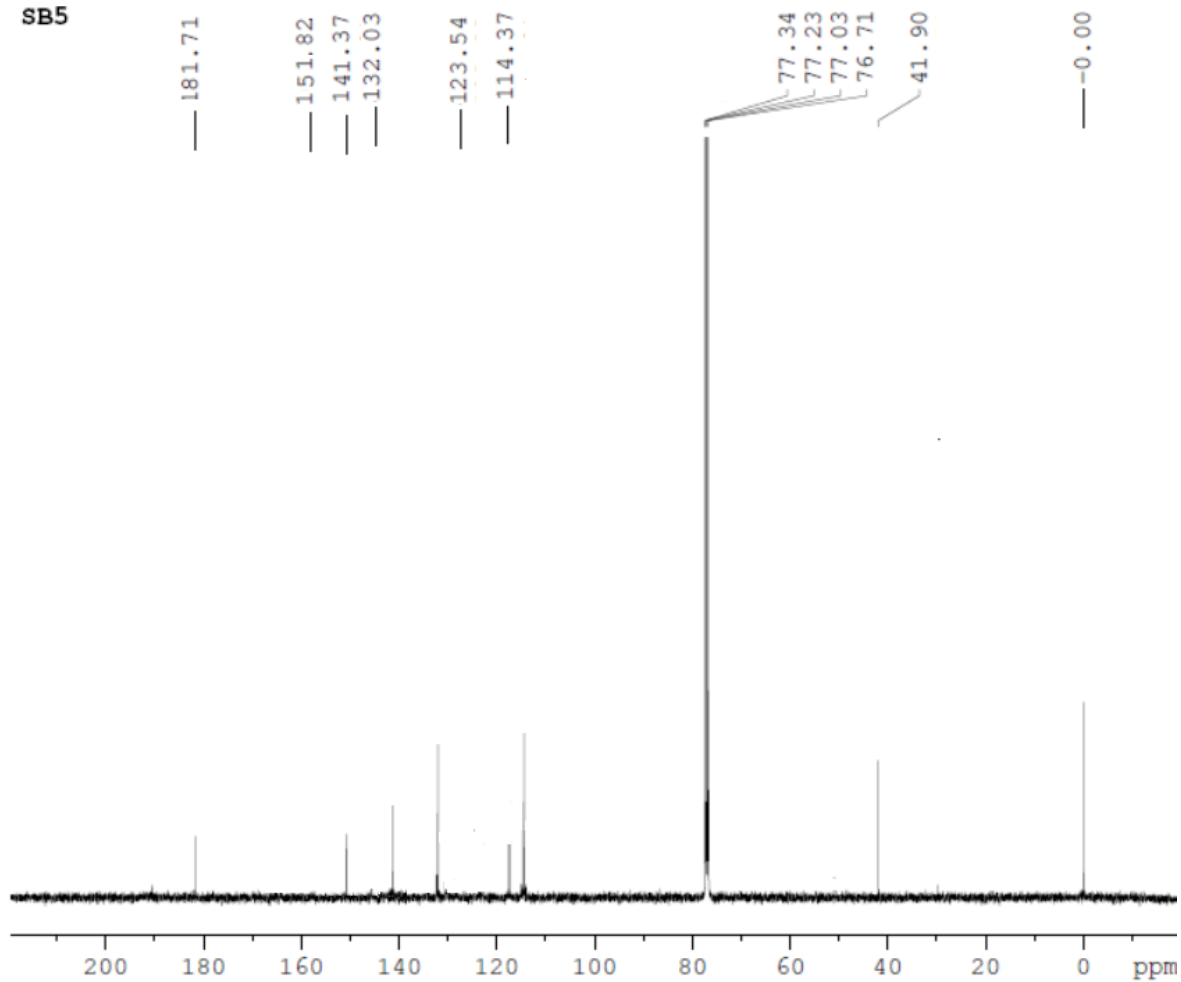

SB6

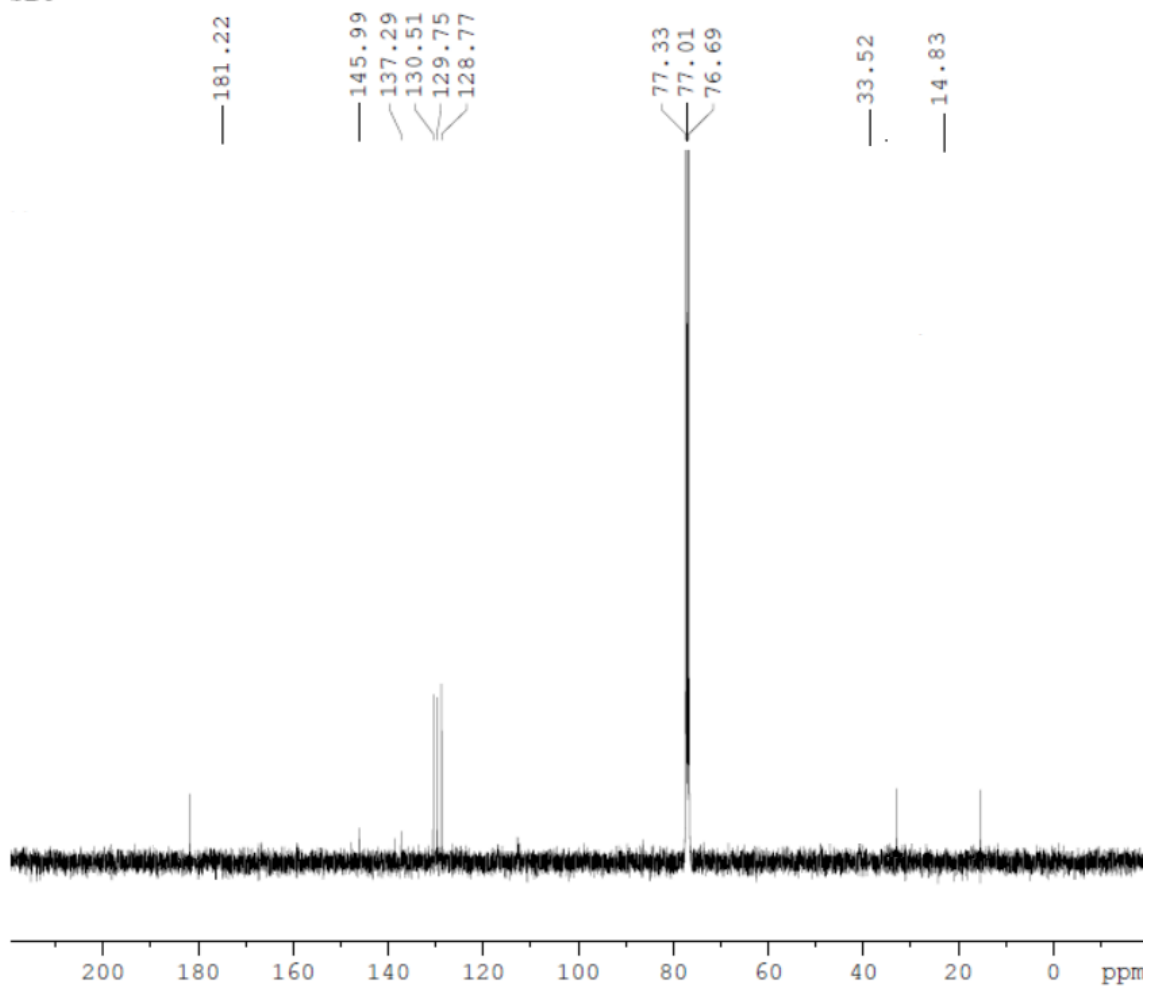

SB7

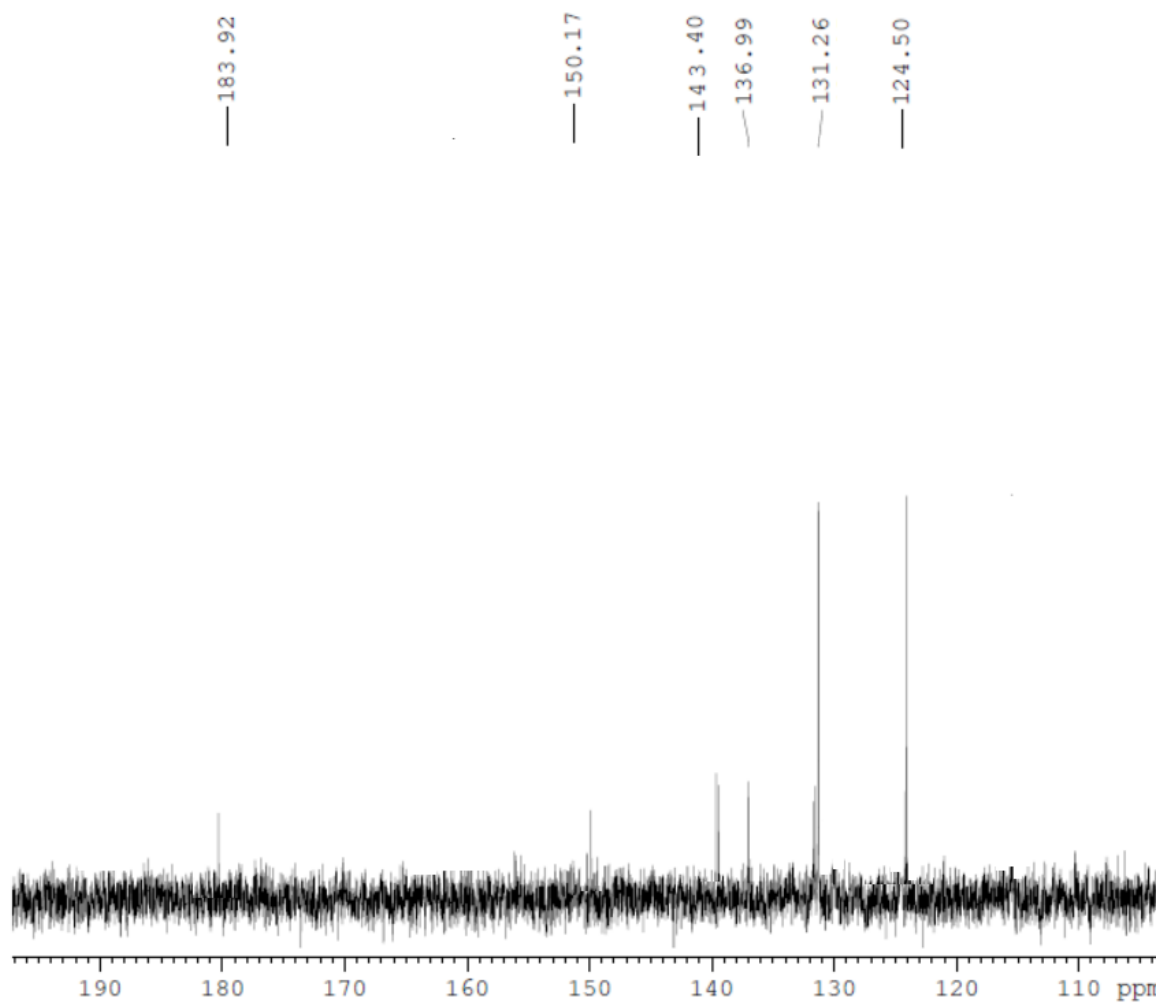

SB8

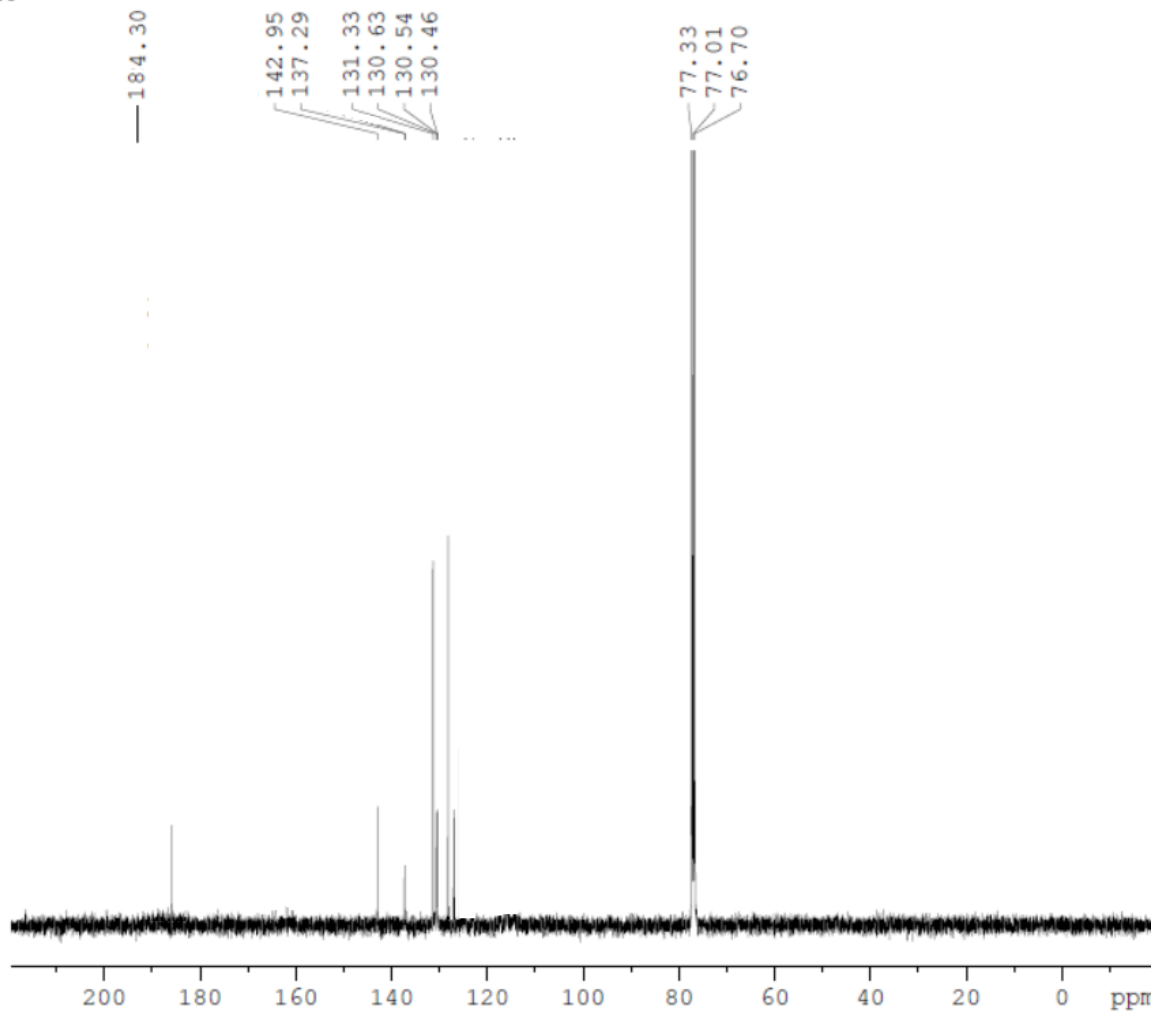

SB9

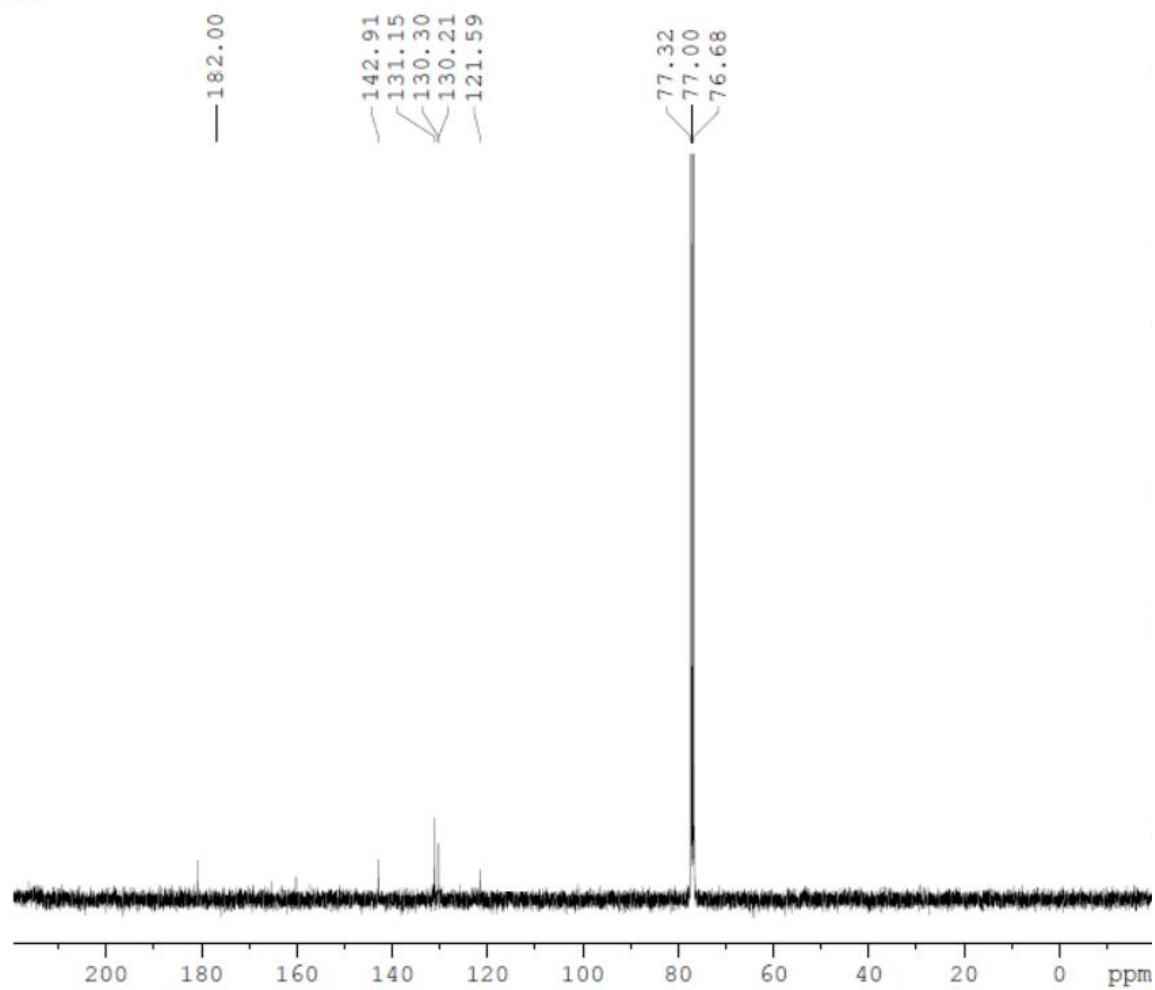



SB10

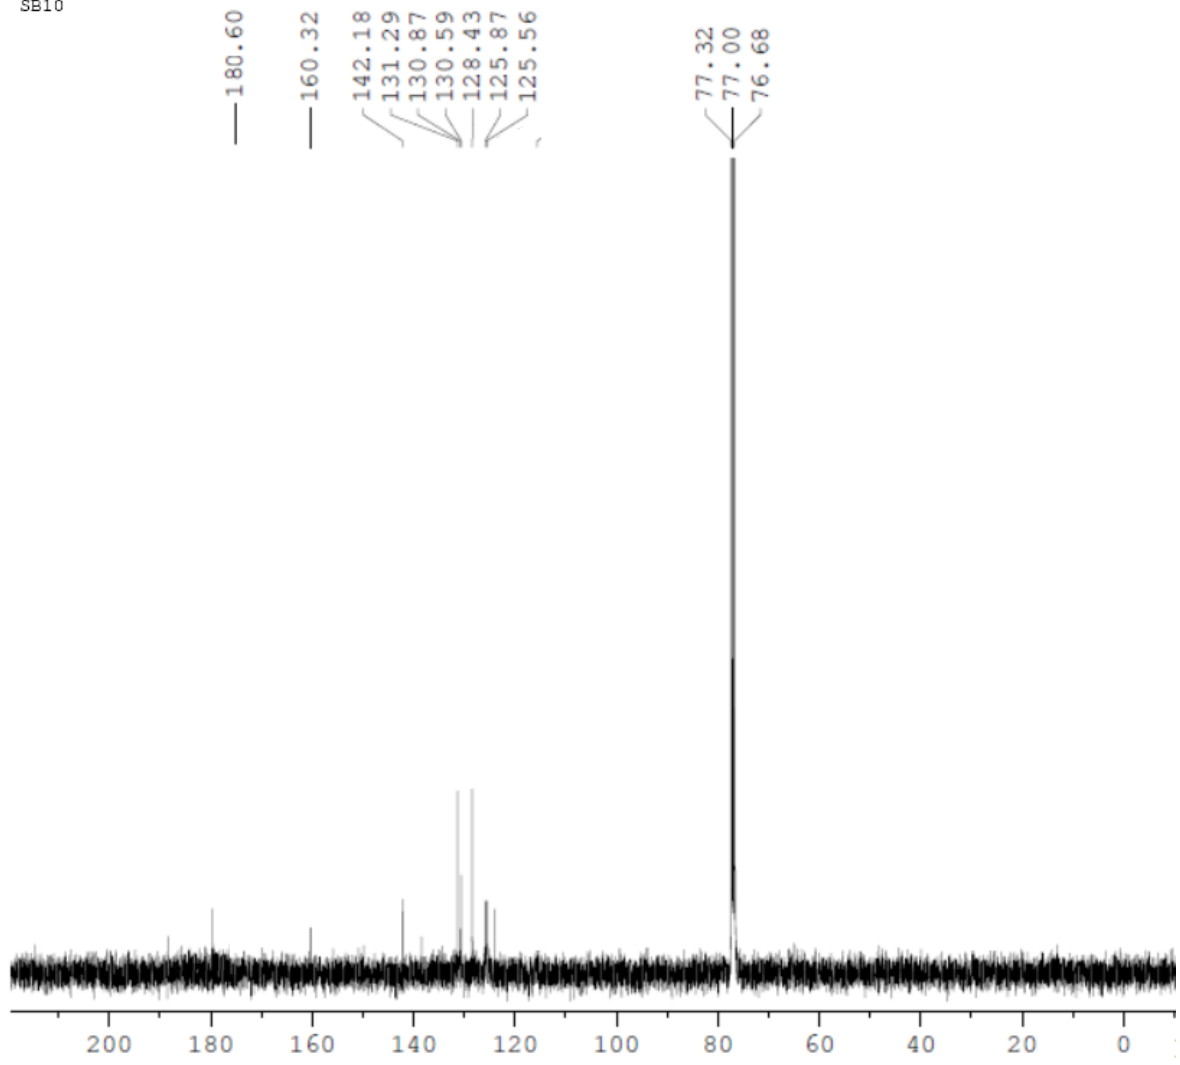

SB11

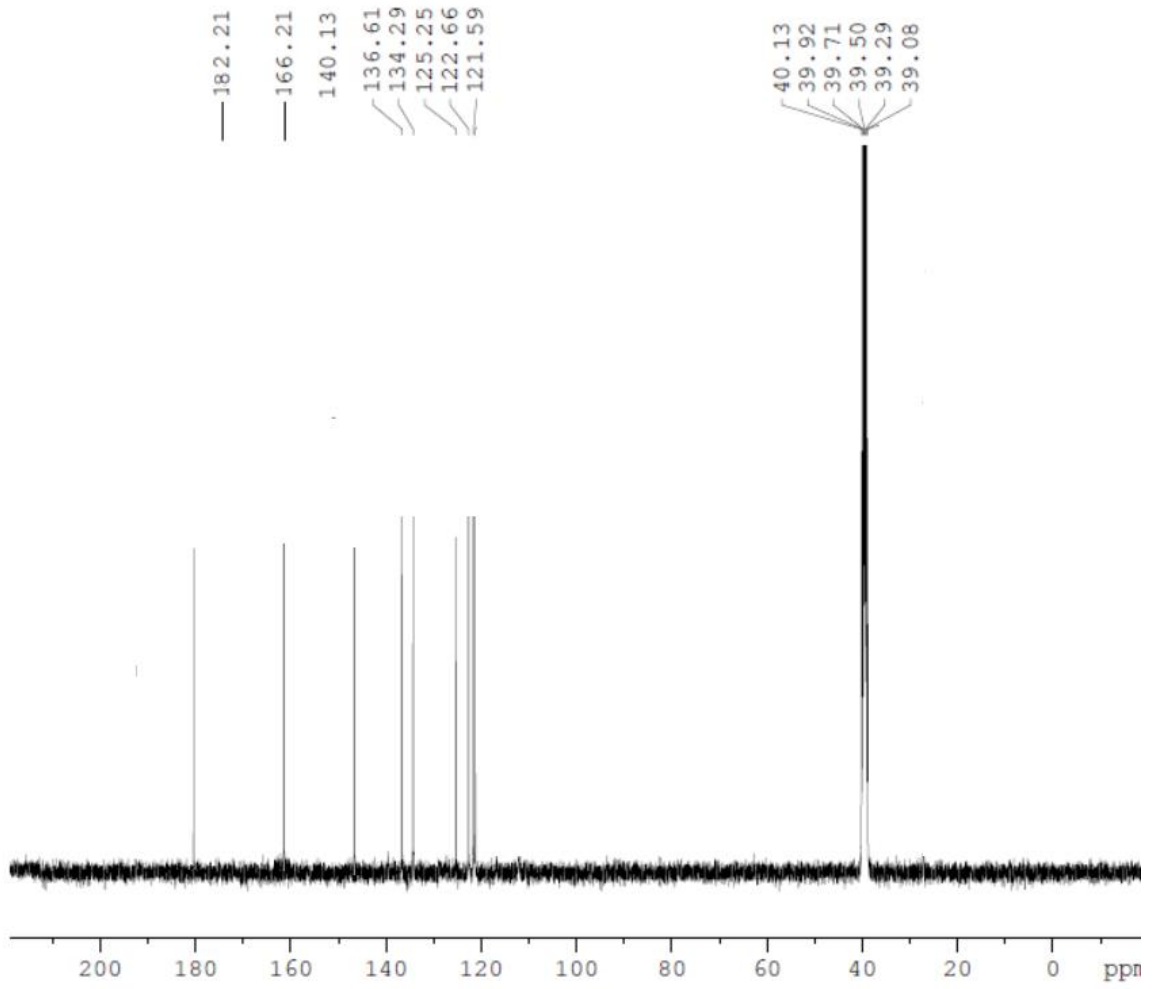

SB12

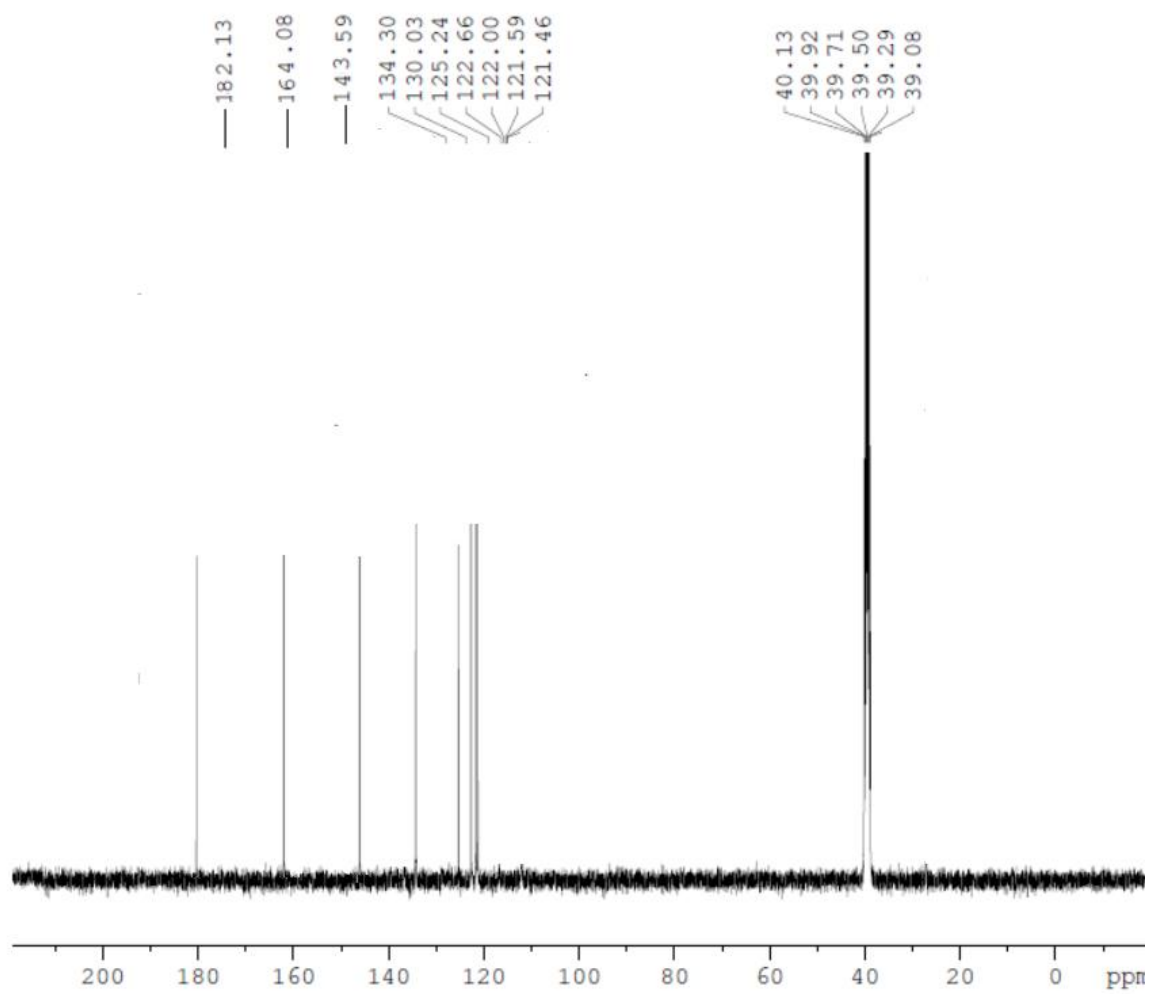

Supplement: c8md00399h1.pdf [file c8md00399h1.pdf]
